# Supplementary material for: Effects of Single or Multiple Sessions of Whole Body Vibration in Stroke: Is There Any Evidence to Support the Clinical Use in Rehabilitation?
Source: Rehabil Res Pract. 2018 Jul 30;2018:8491859. doi: 10.1155/2018/8491859 (PMC6091286; doi:10.1155/2018/8491859)
Supplement: Supplementary Materials — (i) PRISMA Checklists: this file is a brief description of 27 PRISMA items pertaining to the content of a systematic review, indicating where it can be found in the manuscript (pages, tables, and figure), provided as requested by Preferred Reporting Items for Systematic Reviews and Meta-Analyses (PRISMA) Statement. (ii) PubMed Search String: this file is the search string used for the initial research in the first database, provided as requested by revisers. (iii) PubMed Screenshot File 2018-05-12 at 14.54.13: this file is a picture presenting the PubMed search results obtained by applying the declared filters with the PubMed String Search, on 2018-05-12 at 14.54.13. (iv) PubMed Result.csv: this file is a text file-based file format used for importing and exporting of our PubMed search results. [file 8491859.f1.zip › Supplementary Material/PubMed Result.csv]

Title	URL	Description	Details	ShortDetails	Resource	Type	Identifiers	Db	EntrezUID	Properties
Configurable, wearable sensing and vibrotactile feedback system for real-time postural balance and gait training: proof-of-concept.	/pubmed/29020959	Xu J, Bao T, Lee UH, Kinnaird C, Carender W, Huang Y, Sienko KH, Shull PB.	J Neuroeng Rehabil. 2017 Oct 11;14(1):102. doi: 10.1186/s12984-017-0313-3.	J Neuroeng Rehabil. 2017	PubMed	citation	PMID:29020959 | PMCID:PMC5637356	pubmed	29020959	create date:2017/10/13 | first author:Xu J
Is two better than one? Muscle vibration plus robotic rehabilitation to improve upper limb spasticity and function: A pilot randomized controlled trial.	/pubmed/28973024	Calabrò RS, Naro A, Russo M, Milardi D, Leo A, Filoni S, Trinchera A, Bramanti P.	PLoS One. 2017 Oct 3;12(10):e0185936. doi: 10.1371/journal.pone.0185936. eCollection 2017.	PLoS One. 2017	PubMed	citation	PMID:28973024 | PMCID:PMC5626518	pubmed	28973024	create date:2017/10/04 | first author:Calabrò RS
Whole body vibration exercise training for fibromyalgia.	/pubmed/28950401	Bidonde J, Busch AJ, van der Spuy I, Tupper S, Kim SY, Boden C.	Cochrane Database Syst Rev. 2017 Sep 26;9:CD011755. doi: 10.1002/14651858.CD011755.pub2. Review.	Cochrane Database Syst Rev. 2017	PubMed	citation	PMID:28950401	pubmed	28950401	create date:2017/09/28 | first author:Bidonde J
Local vibration inhibits H-reflex but does not compromise manual dexterity and does not increase tremor.	/pubmed/28843638	Budini F, Laudani L, Bernardini S, Macaluso A.	Hum Mov Sci. 2017 Oct;55:221-228. doi: 10.1016/j.humov.2017.08.018. Epub 2017 Sep 1.	Hum Mov Sci. 2017	PubMed	citation	PMID:28843638	pubmed	28843638	create date:2017/08/28 | first author:Budini F
VIBROfocus: Design of a focal vibro-tactile robotic-assistive system for spasticity rehabilitation.	/pubmed/28813915	Vojinovic TJ, Zivanovic A, Carlson T, Loureiro RCV.	IEEE Int Conf Rehabil Robot. 2017 Jul;2017:783-788. doi: 10.1109/ICORR.2017.8009343.	IEEE Int Conf Rehabil Robot. 2017	PubMed	citation	PMID:28813915	pubmed	28813915	create date:2017/08/18 | first author:Vojinovic TJ
WHOLE-BODY VIBRATION EXERCISE IS WELL TOLERATED IN PATIENTS WITH DUCHENNE MUSCULAR DYSTROPHY: A SYSTEMATIC REVIEW.	/pubmed/28740938	Moreira-Marconi E, Sá-Caputo DC, Dionello CF, Guedes-Aguiar EO, Sousa-Gonçalves CR, Morel DS, Paineiras-Domingos LL, Souza PL, Kütter CR, Costa-Cavalcanti RG, Costa G, Paiva PC, Figueiredo C, Brandão-Sobrinho-Neto S, Stark C, Unger M, Bernardo-Filho M.	Afr J Tradit Complement Altern Med. 2017 Jul 7;14(4 Suppl):2-10. doi: 10.21010/ajtcam.v14i4S.1. eCollection 2017. Review.	Afr J Tradit Complement Altern Med. 2017	PubMed	citation	PMID:28740938 | PMCID:PMC5514435	pubmed	28740938	create date:2017/07/26 | first author:Moreira-Marconi E
Somatosensory impairment and its association with balance limitation in people with multiple sclerosis.	/pubmed/28667904	Jamali A, Sadeghi-Demneh E, Fereshtenajad N, Hillier S.	Gait Posture. 2017 Sep;57:224-229. doi: 10.1016/j.gaitpost.2017.06.020. Epub 2017 Jun 24.	Gait Posture. 2017	PubMed	citation	PMID:28667904	pubmed	28667904	create date:2017/07/02 | first author:Jamali A
Patellar tendon vibration reduces the increased facilitation from quadriceps to soleus in post-stroke hemiparetic individuals.	/pubmed/28528818	Maupas E, Dyer JO, Melo SA, Forget R.	Ann Phys Rehabil Med. 2017 Sep;60(5):319-328. doi: 10.1016/j.rehab.2017.03.008. Epub 2017 May 18.	Ann Phys Rehabil Med. 2017	PubMed	citation	PMID:28528818	pubmed	28528818	create date:2017/05/23 | first author:Maupas E
The effect of a haptic biofeedback system on postural control in patients with stroke: An experimental pilot study.	/pubmed/28372470	Yasuda K, Kaibuki N, Harashima H, Iwata H.	Somatosens Mot Res. 2017 Jun;34(2):65-71. doi: 10.1080/08990220.2017.1292236. Epub 2017 Apr 3.	Somatosens Mot Res. 2017	PubMed	citation	PMID:28372470	pubmed	28372470	create date:2017/04/05 | first author:Yasuda K
The effect of a whole-body vibration therapy on the sitting balance of subacute stroke patients: a randomized controlled trial.	/pubmed/28335701	Lee JH, Kim SB, Lee KW, Lee SJ, Park H, Kim DW.	Top Stroke Rehabil. 2017 Sep;24(6):457-462. doi: 10.1080/10749357.2017.1305655. Epub 2017 Mar 23.	Top Stroke Rehabil. 2017	PubMed	citation	PMID:28335701	pubmed	28335701	create date:2017/03/25 | first author:Lee JH
Vibration training after chronic spinal cord injury: Evidence for persistent segmental plasticity.	/pubmed/28315725	Yen CL, McHenry CL, Petrie MA, Dudley-Javoroski S, Shields RK.	Neurosci Lett. 2017 Apr 24;647:129-132. doi: 10.1016/j.neulet.2017.03.019. Epub 2017 Mar 16.	Neurosci Lett. 2017	PubMed	citation	PMID:28315725 | PMCID:PMC5518623	pubmed	28315725	create date:2017/03/21 | first author:Yen CL
After-effects of peripheral neurostimulation on brain plasticity and ankle function in chronic stroke: The role of afferents recruited.	/pubmed/28314519	Beaulieu LD, Massé-Alarie H, Camiré-Bernier S, Ribot-Ciscar É, Schneider C.	Neurophysiol Clin. 2017 Sep;47(4):275-291. doi: 10.1016/j.neucli.2017.02.003. Epub 2017 Mar 15.	Neurophysiol Clin. 2017	PubMed	citation	PMID:28314519	pubmed	28314519	create date:2017/03/21 | first author:Beaulieu LD
Breakthroughs in the spasticity management: Are non-pharmacological treatments the future?	/pubmed/28262404	Naro A, Leo A, Russo M, Casella C, Buda A, Crespantini A, Porcari B, Carioti L, Billeri L, Bramanti A, Bramanti P, Calabrò RS.	J Clin Neurosci. 2017 May;39:16-27. doi: 10.1016/j.jocn.2017.02.044. Epub 2017 Mar 3. Review.	J Clin Neurosci. 2017	PubMed	citation	PMID:28262404	pubmed	28262404	create date:2017/03/07 | first author:Naro A
Focal Muscle Vibration and Progressive Modular Rebalancing with neurokinetic facilitations in post- stroke recovery of upper limb.	/pubmed/28240760	Celletti C, Sinibaldi E, Pierelli F, Monari G, Camerota F.	Clin Ter. 2017 Jan-Feb;168(1):e33-e36. doi: 10.7417/CT.2017.1979.	Clin Ter. 2017	PubMed	citation	PMID:28240760	pubmed	28240760	create date:2017/02/28 | first author:Celletti C
Tactile stimuli affect long-range correlations of stride interval and stride length differently during walking.	/pubmed/28188327	Chien JH, Ambati VNP, Huang CK, Mukherjee M.	Exp Brain Res. 2017 Apr;235(4):1185-1193. doi: 10.1007/s00221-017-4881-z. Epub 2017 Feb 10.	Exp Brain Res. 2017	PubMed	citation	PMID:28188327 | PMCID:PMC5350026	pubmed	28188327	create date:2017/02/12 | first author:Chien JH
A wearable proprioceptive stabilizer for rehabilitation of limb and gait ataxia in hereditary cerebellar ataxias: a pilot open-labeled study.	/pubmed/28039539	Leonardi L, Aceto MG, Marcotulli C, Arcuria G, Serrao M, Pierelli F, Paone P, Filla A, Roca A, Casali C.	Neurol Sci. 2017 Mar;38(3):459-463. doi: 10.1007/s10072-016-2800-x. Epub 2016 Dec 31.	Neurol Sci. 2017	PubMed	citation	PMID:28039539	pubmed	28039539	create date:2017/01/01 | first author:Leonardi L
Focal muscle vibration, an effective rehabilitative approach in severe gait impairment due to multiple sclerosis.	/pubmed/28017240	Camerota F, Celletti C, Di Sipio E, De Fino C, Simbolotti C, Germanotta M, Mirabella M, Padua L, Nociti V.	J Neurol Sci. 2017 Jan 15;372:33-39. doi: 10.1016/j.jns.2016.11.025. Epub 2016 Nov 15.	J Neurol Sci. 2017	PubMed	citation	PMID:28017240	pubmed	28017240	create date:2016/12/27 | first author:Camerota F
Effect of Whole-Body Vibration on Neuromuscular Activation of Leg Muscles During Dynamic Exercises in Individuals With Stroke.	/pubmed/28002180	Liao LR, Pang MYC.	J Strength Cond Res. 2017 Jul;31(7):1954-1962. doi: 10.1519/JSC.0000000000001761.	J Strength Cond Res. 2017	PubMed	citation	PMID:28002180	pubmed	28002180	create date:2016/12/22 | first author:Liao LR
How far do stabilometric and clinical parameters correlate in peripheral neuropathies?	/pubmed/27846434	Gomes Paiva AF, Thoumie P, Missaoui B.	Gait Posture. 2017 Feb;52:11-14. doi: 10.1016/j.gaitpost.2016.11.010. Epub 2016 Nov 9.	Gait Posture. 2017	PubMed	citation	PMID:27846434	pubmed	27846434	create date:2016/11/16 | first author:Gomes Paiva AF
Scaled Vibratory Feedback Can Bias Muscle Use in Children With Dystonia During a Redundant, 1-Dimensional Myocontrol Task.	/pubmed/27798370	Liyanagamage SA, Bertucco M, Bhanpuri NH, Sanger TD.	J Child Neurol. 2017 Feb;32(2):161-169. doi: 10.1177/0883073816671830. Epub 2016 Oct 26.	J Child Neurol. 2017	PubMed	citation	PMID:27798370 | PMCID:PMC5258677	pubmed	27798370	create date:2016/11/01 | first author:Liyanagamage SA
Feasibility and tolerability of whole-body, low-intensity vibration and its effects on muscle function and bone in patients with dystrophinopathies: a pilot study.	/pubmed/27718512	Petryk A, Polgreen LE, Grames M, Lowe DA, Hodges JS, Karachunski P.	Muscle Nerve. 2017 Jun;55(6):875-883. doi: 10.1002/mus.25431. Epub 2017 Feb 6.	Muscle Nerve. 2017	PubMed	citation	PMID:27718512 | PMCID:PMC5385164	pubmed	27718512	create date:2016/10/09 | first author:Petryk A
The Effects of Local Vibration on Balance, Power, and Self-Reported Pain After Exercise.	/pubmed/27632847	Custer L, Peer KS, Miller L.	J Sport Rehabil. 2017 May;26(3):193-201. doi: 10.1123/jsr.2015-0125. Epub 2016 Aug 24.	J Sport Rehabil. 2017	PubMed	citation	PMID:27632847	pubmed	27632847	create date:2016/09/17 | first author:Custer L
Short-term effect of local muscle vibration treatment versus sham therapy on upper limb in chronic post-stroke patients: a randomized controlled trial.	/pubmed/27598342	Costantino C, Galuppo L, Romiti D.	Eur J Phys Rehabil Med. 2017 Feb;53(1):32-40. doi: 10.23736/S1973-9087.16.04211-8. Epub 2016 Sep 6.	Eur J Phys Rehabil Med. 2017	PubMed	citation	PMID:27598342	pubmed	27598342	create date:2016/09/07 | first author:Costantino C
The effects of mechanical focal vibration on walking impairment in multiple sclerosis patients: A randomized, double-blinded vs placebo study.	/pubmed/27567760	Spina E, Carotenuto A, Aceto MG, Cerillo I, Silvestre F, Arace F, Paone P, Orefice G, Iodice R.	Restor Neurol Neurosci. 2016 Sep 21;34(5):869-76. doi: 10.3233/RNN-160665.	Restor Neurol Neurosci. 2016	PubMed	citation	PMID:27567760	pubmed	27567760	create date:2016/08/29 | first author:Spina E
The effects of passive stretching plus vibration on strength and activation of the plantar flexors.	/pubmed/27512816	Miller JD, Herda TJ, Trevino MA, Mosier EM.	Appl Physiol Nutr Metab. 2016 Sep;41(9):917-23. doi: 10.1139/apnm-2016-0010. Epub 2016 Apr 18.	Appl Physiol Nutr Metab. 2016	PubMed	citation	PMID:27512816	pubmed	27512816	create date:2016/08/12 | first author:Miller JD
Current process in hearing-aid fitting appointments: An analysis of audiologists' use of behaviour change techniques using the behaviour change technique taxonomy (v1).	/pubmed/27366971	Barker F, Mackenzie E, de Lusignan S.	Int J Audiol. 2016 Nov;55(11):643-52. doi: 10.1080/14992027.2016.1197425. Epub 2016 Jul 1.	Int J Audiol. 2016	PubMed	citation	PMID:27366971	pubmed	27366971	create date:2016/07/02 | first author:Barker F
Effectiveness of Rehabilitation Interventions to Improve Gait Speed in Children With Cerebral Palsy: Systematic Review and Meta-analysis.	/pubmed/27313240	Moreau NG, Bodkin AW, Bjornson K, Hobbs A, Soileau M, Lahasky K.	Phys Ther. 2016 Dec;96(12):1938-1954. Epub 2016 Jun 16. Review.	Phys Ther. 2016	PubMed	citation	PMID:27313240 | PMCID:PMC5131187	pubmed	27313240	create date:2016/06/18 | first author:Moreau NG
Freezing of gait in Parkinson's disease: Evidence of sensory rather than attentional mechanisms through muscle vibration.	/pubmed/27245918	Pereira MP, Gobbi LT, Almeida QJ.	Parkinsonism Relat Disord. 2016 Aug;29:78-82. doi: 10.1016/j.parkreldis.2016.05.021. Epub 2016 May 21.	Parkinsonism Relat Disord. 2016	PubMed	citation	PMID:27245918	pubmed	27245918	create date:2016/06/02 | first author:Pereira MP
The effects of whole body vibration on muscle strength and functional mobility in persons with multiple sclerosis: A systematic review and meta-analysis.	/pubmed/27237747	Kang H, Lu J, Xu G.	Mult Scler Relat Disord. 2016 May;7:1-7. doi: 10.1016/j.msard.2016.02.008. Epub 2016 Feb 8. Review.	Mult Scler Relat Disord. 2016	PubMed	citation	PMID:27237747	pubmed	27237747	create date:2016/05/31 | first author:Kang H
Efficacy of focal mechanic vibration treatment on balance in Charcot-Marie-Tooth 1A disease: a pilot study.	/pubmed/27177999	Pazzaglia C, Camerota F, Germanotta M, Di Sipio E, Celletti C, Padua L.	J Neurol. 2016 Jul;263(7):1434-41. doi: 10.1007/s00415-016-8157-5. Epub 2016 May 13.	J Neurol. 2016	PubMed	citation	PMID:27177999	pubmed	27177999	create date:2016/05/15 | first author:Pazzaglia C
Short-term effect of neck muscle vibration on postural disturbances in stroke patients.	/pubmed/27165509	Leplaideur S, Leblong E, Jamal K, Rousseau C, Raillon AM, Coignard P, Damphousse M, Bonan I.	Exp Brain Res. 2016 Sep;234(9):2643-51. doi: 10.1007/s00221-016-4668-7. Epub 2016 May 10.	Exp Brain Res. 2016	PubMed	citation	PMID:27165509	pubmed	27165509	create date:2016/05/12 | first author:Leplaideur S
The effects of prolonged wear of textured shoe insoles on gait, foot sensation and proprioception in people with multiple sclerosis: study protocol for a randomised controlled trial.	/pubmed/27098452	Hatton AL, Dixon J, Rome K, Brauer SG, Williams K, Kerr G.	Trials. 2016 Apr 21;17(1):208. doi: 10.1186/s13063-016-1337-x.	Trials. 2016	PubMed	citation	PMID:27098452 | PMCID:PMC4839159	pubmed	27098452	create date:2016/04/22 | first author:Hatton AL
Three Case Reports of Successful Vibration Therapy of the Plantar Fascia for Spasticity Due to Cerebral Palsy-Like Syndrome, Fetal-Type Minamata Disease.	/pubmed/27082608	Usuki F, Tohyama S.	Medicine (Baltimore). 2016 Apr;95(15):e3385. doi: 10.1097/MD.0000000000003385.	Medicine (Baltimore). 2016	PubMed	citation	PMID:27082608 | PMCID:PMC4839852	pubmed	27082608	create date:2016/04/16 | first author:Usuki F
Whole-Body Vibration Results in Short-Term Improvement in the Gait of Children With Idiopathic Toe Walking.	/pubmed/27071469	Williams CM, Michalitsis J, Murphy AT, Rawicki B, Haines TP.	J Child Neurol. 2016 Aug;31(9):1143-9. doi: 10.1177/0883073816643405. Epub 2016 Apr 12.	J Child Neurol. 2016	PubMed	citation	PMID:27071469	pubmed	27071469	create date:2016/04/14 | first author:Williams CM
Effect of Focal Muscle Vibration on Calf Muscle Spasticity: A Proof-of-Concept Study.	/pubmed/26994885	Seo HG, Oh BM, Leigh JH, Chun C, Park C, Kim CH.	PM R. 2016 Nov;8(11):1083-1089. doi: 10.1016/j.pmrj.2016.03.004. Epub 2016 Mar 16.	PM R. 2016	PubMed	citation	PMID:26994885	pubmed	26994885	create date:2016/03/21 | first author:Seo HG
Whole-Body Vibration Intensities in Chronic Stroke: A Randomized Controlled Trial.	/pubmed/26918558	Liao LR, Ng GY, Jones AY, Huang MZ, Pang MY.	Med Sci Sports Exerc. 2016 Jul;48(7):1227-38. doi: 10.1249/MSS.0000000000000909.	Med Sci Sports Exerc. 2016	PubMed	citation	PMID:26918558	pubmed	26918558	create date:2016/02/27 | first author:Liao LR
Short-Term Effects of Whole-Body Vibration Combined with Task-Related Training on Upper Extremity Function, Spasticity, and Grip Strength in Subjects with Poststroke Hemiplegia: A Pilot Randomized Controlled Trial.	/pubmed/26829094	Lee JS, Kim CY, Kim HD.	Am J Phys Med Rehabil. 2016 Aug;95(8):608-17. doi: 10.1097/PHM.0000000000000454.	Am J Phys Med Rehabil. 2016	PubMed	citation	PMID:26829094	pubmed	26829094	create date:2016/02/02 | first author:Lee JS
Interactive Sensor-Based Balance Training in Older Cancer Patients with Chemotherapy-Induced Peripheral Neuropathy: A Randomized Controlled Trial.	/pubmed/26678611	Schwenk M, Grewal GS, Holloway D, Muchna A, Garland L, Najafi B.	Gerontology. 2016;62(5):553-63. doi: 10.1159/000442253. Epub 2015 Dec 18.	Gerontology. 2016	PubMed	citation	PMID:26678611	pubmed	26678611	create date:2015/12/19 | first author:Schwenk M
Effects of whole body vibration on muscle spasticity for people with central nervous system disorders: a systematic review.	/pubmed/26658333	Huang M, Liao LR, Pang MY.	Clin Rehabil. 2017 Jan;31(1):23-33. doi: 10.1177/0269215515621117. Epub 2016 Jul 11. Review.	Clin Rehabil. 2017	PubMed	citation	PMID:26658333	pubmed	26658333	create date:2015/12/15 | first author:Huang M
Effects of whole body vibration on hormonal & functional indices in patients with multiple sclerosis.	/pubmed/26609037	Ebrahimi A, Eftekhari E, Etemadifar M.	Indian J Med Res. 2015 Oct;142(4):450-8. doi: 10.4103/0971-5916.169210.	Indian J Med Res. 2015	PubMed	citation	PMID:26609037 | PMCID:PMC4683830	pubmed	26609037	create date:2015/11/27 | first author:Ebrahimi A
Smartphone-based tactile cueing improves motor performance in Parkinson's disease.	/pubmed/26589004	Ivkovic V, Fisher S, Paloski WH.	Parkinsonism Relat Disord. 2016 Jan;22:42-7. doi: 10.1016/j.parkreldis.2015.11.006. Epub 2015 Nov 6.	Parkinsonism Relat Disord. 2016	PubMed	citation	PMID:26589004	pubmed	26589004	create date:2015/11/22 | first author:Ivkovic V
The Effects of Expiratory Muscle Strength Training on Voice and Associated Factors in Medical Professionals With Voice Disorders.	/pubmed/26564581	Tsai YC, Huang S, Che WC, Huang YC, Liou TH, Kuo YC.	J Voice. 2016 Nov;30(6):759.e21-759.e27. doi: 10.1016/j.jvoice.2015.09.012. Epub 2015 Nov 10.	J Voice. 2016	PubMed	citation	PMID:26564581	pubmed	26564581	create date:2015/11/14 | first author:Tsai YC
Whole Body Vibration Training Improves Walking Performance of Stroke Patients with Knee Hyperextension: A Randomized Controlled Pilot Study.	/pubmed/26556074	Guo C, Mi X, Liu S, Yi W, Gong C, Zhu L, Machado S, Yuan TF, Shan C.	CNS Neurol Disord Drug Targets. 2015;14(9):1110-5.	CNS Neurol Disord Drug Targets. 2015	PubMed	citation	PMID:26556074	pubmed	26556074	create date:2015/11/12 | first author:Guo C
Muscle-bone interactions: From experimental models to the clinic? A critical update.	/pubmed/26506009	Laurent MR, Dubois V, Claessens F, Verschueren SM, Vanderschueren D, Gielen E, Jardí F.	Mol Cell Endocrinol. 2016 Sep 5;432:14-36. doi: 10.1016/j.mce.2015.10.017. Epub 2015 Oct 23. Review.	Mol Cell Endocrinol. 2016	PubMed	citation	PMID:26506009	pubmed	26506009	create date:2015/10/28 | first author:Laurent MR
Acute effects of simultaneous electromyostimulation and vibration on leg blood flow in spinal cord injury.	/pubmed/26458973	Menéndez H, Ferrero C, Martín-Hernández J, Figueroa A, Marín PJ, Herrero AJ.	Spinal Cord. 2016 May;54(5):383-9. doi: 10.1038/sc.2015.181. Epub 2015 Oct 13.	Spinal Cord. 2016	PubMed	citation	PMID:26458973	pubmed	26458973	create date:2015/10/16 | first author:Menéndez H
Effects of long-term whole-body vibration training on mobility in patients with multiple sclerosis: A meta-analysis of randomized controlled trials.	/pubmed/26421830	Kantele S, Karinkanta S, Sievänen H.	J Neurol Sci. 2015 Nov 15;358(1-2):31-7. doi: 10.1016/j.jns.2015.09.357. Epub 2015 Sep 25. Review.	J Neurol Sci. 2015	PubMed	citation	PMID:26421830	pubmed	26421830	create date:2015/10/01 | first author:Kantele S
Site-Specific Transmission of a Floor-Based, High-Frequency, Low-Magnitude Vibration Stimulus in Children With Spastic Cerebral Palsy.	/pubmed/26392035	Singh H, Whitney DG, Knight CA, Miller F, Manal K, Kolm P, Modlesky CM.	Arch Phys Med Rehabil. 2016 Feb;97(2):218-23. doi: 10.1016/j.apmr.2015.08.434. Epub 2015 Sep 21.	Arch Phys Med Rehabil. 2016	PubMed	citation	PMID:26392035 | PMCID:PMC4996345	pubmed	26392035	create date:2015/09/24 | first author:Singh H
The effect of whole-body vibration and resistance training on muscle strength in a 13-year-old boy with m. biceps femoris lesion and posttraumatic calcification.	/pubmed/26364461	Pantović M, Madić D, Popović B, Batez M, Obradović J.	Vojnosanit Pregl. 2015 Jul;72(7):646-50.	Vojnosanit Pregl. 2015	PubMed	citation	PMID:26364461	pubmed	26364461	create date:2015/09/15 | first author:Pantović M
The effects of different sensory augmentation on weight-shifting balance exercises in Parkinson's disease and healthy elderly people: a proof-of-concept study.	/pubmed/26329918	Lee BC, Thrasher TA, Fisher SP, Layne CS.	J Neuroeng Rehabil. 2015 Sep 2;12:75. doi: 10.1186/s12984-015-0064-y.	J Neuroeng Rehabil. 2015	PubMed	citation	PMID:26329918 | PMCID:PMC4557900	pubmed	26329918	create date:2015/09/04 | first author:Lee BC
Immediate effects of somatosensory stimulation on hand function in patients with poststroke hemiparesis: a randomized cross-over trial.	/pubmed/26258447	Sim SM, Oh DW, Chon SC.	Int J Rehabil Res. 2015 Dec;38(4):306-12. doi: 10.1097/MRR.0000000000000126.	Int J Rehabil Res. 2015	PubMed	citation	PMID:26258447	pubmed	26258447	create date:2015/08/11 | first author:Sim SM
Comparing the effects of whole-body vibration to standard exercise in ambulatory people with Multiple Sclerosis: a randomised controlled feasibility study.	/pubmed/26219667	Uszynski MK, Purtill H, Donnelly A, Coote S.	Clin Rehabil. 2016 Jul;30(7):657-68. doi: 10.1177/0269215515595522. Epub 2015 Jul 27.	Clin Rehabil. 2016	PubMed	citation	PMID:26219667	pubmed	26219667	create date:2015/07/30 | first author:Uszynski MK
Systematic review of adjunct therapies to improve outcomes following botulinum toxin injection for treatment of limb spasticity.	/pubmed/26198891	Mills PB, Finlayson H, Sudol M, O'Connor R.	Clin Rehabil. 2016 Jun;30(6):537-48. doi: 10.1177/0269215515593783. Epub 2015 Jul 21. Review.	Clin Rehabil. 2016	PubMed	citation	PMID:26198891	pubmed	26198891	create date:2015/07/23 | first author:Mills PB
A Portable Gait Asymmetry Rehabilitation System for Individuals with Stroke Using a Vibrotactile Feedback.	/pubmed/26161398	Afzal MR, Oh MK, Lee CH, Park YS, Yoon J.	Biomed Res Int. 2015;2015:375638. doi: 10.1155/2015/375638. Epub 2015 Jun 16.	Biomed Res Int. 2015	PubMed	citation	PMID:26161398 | PMCID:PMC4486481	pubmed	26161398	create date:2015/07/15 | first author:Afzal MR
Effects of whole body vibration training on people with chronic stroke: a systematic review and meta-analysis.	/pubmed/26084320	Lu J, Xu G, Wang Y.	Top Stroke Rehabil. 2015 Jun;22(3):161-8. doi: 10.1179/1074935714Z.0000000005. Epub 2015 Feb 24. Review.	Top Stroke Rehabil. 2015	PubMed	citation	PMID:26084320	pubmed	26084320	create date:2015/06/19 | first author:Lu J
Effect of Whole-Body Vibration on Balance Using Posturography and Balance Tests in Postmenopausal Women.	/pubmed/26035724	Sucuoglu H, Tuzun S, Akbaba YA, Uludag M, Gokpinar HH.	Am J Phys Med Rehabil. 2015 Jul;94(7):499-507. doi: 10.1097/PHM.0000000000000325.	Am J Phys Med Rehabil. 2015	PubMed	citation	PMID:26035724	pubmed	26035724	create date:2015/06/03 | first author:Sucuoglu H
The effects of whole body vibration on mobility and balance in children with cerebral palsy: a systematic review with meta-analysis.	/pubmed/26032205	Saquetto M, Carvalho V, Silva C, Conceição C, Gomes-Neto M.	J Musculoskelet Neuronal Interact. 2015 Jun;15(2):137-44. Review.	J Musculoskelet Neuronal Interact. 2015	PubMed	citation	PMID:26032205 | PMCID:PMC5133716	pubmed	26032205	create date:2015/06/03 | first author:Saquetto M
The influence of somatosensory and muscular deficits on postural stabilization: Insights from an instrumented analysis of subjects affected by different types of Charcot-Marie-Tooth disease.	/pubmed/26028275	Lencioni T, Piscosquito G, Rabuffetti M, Bovi G, Calabrese D, Aiello A, Di Sipio E, Padua L, Diverio M, Pareyson D, Ferrarin M.	Neuromuscul Disord. 2015 Aug;25(8):640-5. doi: 10.1016/j.nmd.2015.05.003. Epub 2015 May 11.	Neuromuscul Disord. 2015	PubMed	citation	PMID:26028275 | PMCID:PMC4553554	pubmed	26028275	create date:2015/06/02 | first author:Lencioni T
Effects of Vibration Intensity, Exercise, and Motor Impairment on Leg Muscle Activity Induced by Whole-Body Vibration in People With Stroke.	/pubmed/26023219	Liao LR, Ng GY, Jones AY, Chung RC, Pang MY.	Phys Ther. 2015 Dec;95(12):1617-27. doi: 10.2522/ptj.20140507. Epub 2015 May 28.	Phys Ther. 2015	PubMed	citation	PMID:26023219	pubmed	26023219	create date:2015/05/30 | first author:Liao LR
Outcome Measurement in Adult Auditory Rehabilitation: A Scoping Review of Measures Used in Randomized Controlled Trials.	/pubmed/25919402	Barker F, MacKenzie E, Elliott L, de Lusignan S.	Ear Hear. 2015 Sep-Oct;36(5):567-73. doi: 10.1097/AUD.0000000000000167. Review.	Ear Hear. 2015	PubMed	citation	PMID:25919402	pubmed	25919402	create date:2015/04/29 | first author:Barker F
Early post-stroke period: A privileged time for sensory re-weighting?	/pubmed/25898240	Bonan IV, Gaillard F, Ponche ST, Marquer A, Vidal PP, Yelnik AP.	J Rehabil Med. 2015 Jun;47(6):516-22. doi: 10.2340/16501977-1968.	J Rehabil Med. 2015	PubMed	citation	PMID:25898240	pubmed	25898240	create date:2015/04/22 | first author:Bonan IV
Evidence for early neurodegeneration in the cervical cord of patients with primary progressive multiple sclerosis.	/pubmed/25863355	Abdel-Aziz K, Schneider T, Solanky BS, Yiannakas MC, Altmann DR, Wheeler-Kingshott CA, Peters AL, Day BL, Thompson AJ, Ciccarelli O.	Brain. 2015 Jun;138(Pt 6):1568-82. doi: 10.1093/brain/awv086. Epub 2015 Apr 10.	Brain. 2015	PubMed	citation	PMID:25863355 | PMCID:PMC4614136	pubmed	25863355	create date:2015/04/12 | first author:Abdel-Aziz K
Systematic review of whole body vibration exercises in the treatment of cerebral palsy: Brief report.	/pubmed/25826535	Sá-Caputo DC, Costa-Cavalcanti R, Carvalho-Lima RP, Arnóbio A, Bernardo RM, Ronikeile-Costa P, Kutter C, Giehl PM, Asad NR, Paiva DN, Pereira HV, Unger M, Marin PJ, Bernardo-Filho M.	Dev Neurorehabil. 2016 Oct;19(5):327-33. doi: 10.3109/17518423.2014.994713. Epub 2015 Mar 31. Review.	Dev Neurorehabil. 2016	PubMed	citation	PMID:25826535	pubmed	25826535	create date:2015/04/01 | first author:Sá-Caputo DC
Clinical strategies for addressing muscle weakness following knee injury.	/pubmed/25818714	Pietrosimone B, Blackburn JT, Harkey MS, Luc BA, Pamukoff DN, Hart JM.	Clin Sports Med. 2015 Apr;34(2):285-300. doi: 10.1016/j.csm.2014.12.003. Epub 2015 Jan 24. Review.	Clin Sports Med. 2015	PubMed	citation	PMID:25818714	pubmed	25818714	create date:2015/03/31 | first author:Pietrosimone B
Update on rehabilitation in multiple sclerosis.	/pubmed/25746432	Donzé C.	Presse Med. 2015 Apr;44(4 Pt 2):e169-76. doi: 10.1016/j.lpm.2014.10.019. Epub 2015 Mar 4. Review.	Presse Med. 2015	PubMed	citation	PMID:25746432	pubmed	25746432	create date:2015/03/10 | first author:Donzé C
Single-dose effects of whole body vibration on quadriceps strength in individuals with motor-incomplete spinal cord injury.	/pubmed/25664489	Bosveld R, Field-Fote EC.	J Spinal Cord Med. 2015 Nov;38(6):784-91. doi: 10.1179/2045772315Y.0000000002. Epub 2015 Feb 9.	J Spinal Cord Med. 2015	PubMed	citation	PMID:25664489 | PMCID:PMC4725812	pubmed	25664489	create date:2015/02/11 | first author:Bosveld R
Effects of an eight-week whole body vibration on lower extremity muscle tone and function in children with cerebral palsy.	/pubmed/25575288	Cheng HY, Yu YC, Wong AM, Tsai YS, Ju YY.	Res Dev Disabil. 2015 Mar;38:256-61. doi: 10.1016/j.ridd.2014.12.017. Epub 2015 Jan 7.	Res Dev Disabil. 2015	PubMed	citation	PMID:25575288	pubmed	25575288	create date:2015/01/13 | first author:Cheng HY
Osteosarcopenic obesity and fall prevention strategies.	/pubmed/25533145	Hita-Contreras F, Martínez-Amat A, Cruz-Díaz D, Pérez-López FR.	Maturitas. 2015 Feb;80(2):126-32. doi: 10.1016/j.maturitas.2014.11.009. Epub 2014 Nov 25. Review.	Maturitas. 2015	PubMed	citation	PMID:25533145	pubmed	25533145	create date:2014/12/24 | first author:Hita-Contreras F
Sensory and motor peripheral nerve function and incident mobility disability.	/pubmed/25482096	Ward RE, Boudreau RM, Caserotti P, Harris TB, Zivkovic S, Goodpaster BH, Satterfield S, Kritchevsky SB, Schwartz AV, Vinik AI, Cauley JA, Simonsick EM, Newman AB, Strotmeyer ES; Health, Aging and Body Composition Study..	J Am Geriatr Soc. 2014 Dec;62(12):2273-9. doi: 10.1111/jgs.13152. Epub 2014 Dec 8. Erratum in: J Am Geriatr Soc. 2015 Mar;63(3):625.	J Am Geriatr Soc. 2014	PubMed	citation	PMID:25482096 | PMCID:PMC4270855	pubmed	25482096	create date:2014/12/09 | first author:Ward RE
Effects of whole body vibration on spasticity and lower extremity function in children with cerebral palsy.	/pubmed/25461434	Cheng HY, Ju YY, Chen CL, Chuang LL, Cheng CH.	Hum Mov Sci. 2015 Feb;39:65-72. doi: 10.1016/j.humov.2014.11.003. Epub 2014 Nov 24.	Hum Mov Sci. 2015	PubMed	citation	PMID:25461434	pubmed	25461434	create date:2014/12/03 | first author:Cheng HY
Relationship between foot vibration threshold and walking and balance functions in people with Multiple Sclerosis (PwMS).	/pubmed/25455206	Uszynski M, Purtill H, Coote S.	Gait Posture. 2015 Jan;41(1):228-32. doi: 10.1016/j.gaitpost.2014.10.010. Epub 2014 Oct 18.	Gait Posture. 2015	PubMed	citation	PMID:25455206	pubmed	25455206	create date:2014/12/03 | first author:Uszynski M
Neck muscle vibration can improve sensorimotor function in patients with neck pain.	/pubmed/25452010	Beinert K, Keller M, Taube W.	Spine J. 2015 Mar 1;15(3):514-21. doi: 10.1016/j.spinee.2014.10.013. Epub 2014 Oct 22.	Spine J. 2015	PubMed	citation	PMID:25452010	pubmed	25452010	create date:2014/12/03 | first author:Beinert K
3-week whole body vibration does not improve gait function in mildly affected multiple sclerosis patients--a randomized controlled trial.	/pubmed/25439165	Wolfsegger T, Assar H, Topakian R.	J Neurol Sci. 2014 Dec 15;347(1-2):119-23. doi: 10.1016/j.jns.2014.09.030. Epub 2014 Sep 26.	J Neurol Sci. 2014	PubMed	citation	PMID:25439165	pubmed	25439165	create date:2014/12/03 | first author:Wolfsegger T
Characterizing the effects of amplitude, frequency and limb position on vibration induced movement illusions: Implications in sensory-motor rehabilitation.	/pubmed/25425585	Schofield JS, Dawson MR, Carey JP, Hebert JS.	Technol Health Care. 2015;23(2):129-41. doi: 10.3233/THC-140879.	Technol Health Care. 2015	PubMed	citation	PMID:25425585 | PMCID:PMC4620932	pubmed	25425585	create date:2014/11/27 | first author:Schofield JS
A wearable proprioceptive stabilizer (Equistasi®) for rehabilitation of postural instability in Parkinson's disease: a phase II randomized double-blind, double-dummy, controlled study.	/pubmed/25401967	Volpe D, Giantin MG, Fasano A.	PLoS One. 2014 Nov 17;9(11):e112065. doi: 10.1371/journal.pone.0112065. eCollection 2014.	PLoS One. 2014	PubMed	citation	PMID:25401967 | PMCID:PMC4234681	pubmed	25401967	create date:2014/11/18 | first author:Volpe D
Cortical vs. afferent stimulation as an adjunct to functional task practice training: a randomized, comparative pilot study in people with cervical spinal cord injury.	/pubmed/25381344	Gomes-Osman J, Field-Fote EC.	Clin Rehabil. 2015 Aug;29(8):771-82. doi: 10.1177/0269215514556087. Epub 2014 Nov 7.	Clin Rehabil. 2015	PubMed	citation	PMID:25381344	pubmed	25381344	create date:2014/11/09 | first author:Gomes-Osman J
Neuromuscular training based on whole body vibration in children with spina bifida: a retrospective analysis of a new physiotherapy treatment program.	/pubmed/25370032	Stark C, Hoyer-Kuhn HK, Semler O, Hoebing L, Duran I, Cremer R, Schoenau E.	Childs Nerv Syst. 2015 Feb;31(2):301-9. doi: 10.1007/s00381-014-2577-2. Epub 2014 Nov 5.	Childs Nerv Syst. 2015	PubMed	citation	PMID:25370032	pubmed	25370032	create date:2014/11/06 | first author:Stark C
Efficacy of mechano-acoustic vibration on strength, pain, and function in poststroke rehabilitation: a pilot study.	/pubmed/25341384	Constantino C, Galuppo L, Romiti D.	Top Stroke Rehabil. 2014 Sep-Oct;21(5):391-9. doi: 10.1310/tsr2105-391.	Top Stroke Rehabil. 2014	PubMed	citation	PMID:25341384	pubmed	25341384	create date:2014/10/25 | first author:Constantino C
The effect of whole body vibration on balance, gait performance and mobility in people with stroke: a systematic review and meta-analysis.	/pubmed/25311142	Yang X, Wang P, Liu C, He C, Reinhardt JD.	Clin Rehabil. 2015 Jul;29(7):627-38. doi: 10.1177/0269215514552829. Epub 2014 Oct 13. Review.	Clin Rehabil. 2015	PubMed	citation	PMID:25311142	pubmed	25311142	create date:2014/10/15 | first author:Yang X
Effect of Whole-Body Vibration Training on Standing Balance and Muscle Strength in Children with Down Syndrome.	/pubmed/25299536	Eid MA.	Am J Phys Med Rehabil. 2015 Aug;94(8):633-43. doi: 10.1097/PHM.0000000000000224.	Am J Phys Med Rehabil. 2015	PubMed	citation	PMID:25299536	pubmed	25299536	create date:2014/10/10 | first author:Eid MA
The Effects of Vibration on the Gait Pattern and Vibration Perception Threshold of Children With Idiopathic Toe Walking.	/pubmed/25260915	Fanchiang HD, Geil M, Wu J, Chen YP, Wang YT.	J Child Neurol. 2015 Jul;30(8):1010-6. doi: 10.1177/0883073814550655. Epub 2014 Sep 26.	J Child Neurol. 2015	PubMed	citation	PMID:25260915	pubmed	25260915	create date:2014/09/28 | first author:Fanchiang HD
Effect of whole-body vibration therapy on performance recovery.	/pubmed/25229836	Manimmanakorn N, Ross JJ, Manimmanakorn A, Lucas SJ, Hamlin MJ.	Int J Sports Physiol Perform. 2015 Apr;10(3):388-95. doi: 10.1123/ijspp.2014-0225. Epub 2014 Sep 17.	Int J Sports Physiol Perform. 2015	PubMed	citation	PMID:25229836	pubmed	25229836	create date:2014/09/18 | first author:Manimmanakorn N
Sarcopenia: monitoring, molecular mechanisms, and physical intervention.	/pubmed/25157651	Zembroń-Łacny A, Dziubek W, Rogowski Ł, Skorupka E, Dąbrowska G.	Physiol Res. 2014;63(6):683-91. Epub 2014 Aug 26. Review.	Physiol Res. 2014	PubMed	citation	PMID:25157651	pubmed	25157651	create date:2014/08/27 | first author:Zembroń-Łacny A
Role of proprioceptive information to control balance during gait in healthy and hemiparetic individuals.	/pubmed/25127297	Mullie Y, Duclos C.	Gait Posture. 2014 Sep;40(4):610-5. doi: 10.1016/j.gaitpost.2014.07.008. Epub 2014 Jul 20.	Gait Posture. 2014	PubMed	citation	PMID:25127297	pubmed	25127297	create date:2014/08/16 | first author:Mullie Y
Muscle activity, cross-sectional area, and density following passive standing and whole body vibration: A case series.	/pubmed/25059652	Masani K, Alizadeh-Meghrazi M, Sayenko DG, Zariffa J, Moore C, Giangregorio L, Popovic MR, Catharine Craven B.	J Spinal Cord Med. 2014 Sep;37(5):575-81. doi: 10.1179/2045772314Y.0000000255. Epub 2014 Jul 24.	J Spinal Cord Med. 2014	PubMed	citation	PMID:25059652 | PMCID:PMC4166192	pubmed	25059652	create date:2014/07/26 | first author:Masani K
Effects of whole-body vibration with stochastic resonance on balance in persons with balance disability and falls history - a systematic review.	/pubmed/24950116	Rogan S, Hilfiker R, Schenk A, Vogler A, Taeymans J.	Res Sports Med. 2014;22(3):294-313. doi: 10.1080/15438627.2014.919504. Review.	Res Sports Med. 2014	PubMed	citation	PMID:24950116	pubmed	24950116	create date:2014/06/21 | first author:Rogan S
Complex muscle vibration patterns to induce gait-like lower-limb movements: proof of concept.	/pubmed/24933722	Duclos C, Kemlin C, Lazert D, Gagnon D, Dyer JO, Forget R.	J Rehabil Res Dev. 2014;51(2):245-51. doi: 10.1682/JRRD.2013.04.0079.	J Rehabil Res Dev. 2014	PubMed	citation	PMID:24933722	pubmed	24933722	create date:2014/06/17 | first author:Duclos C
Focal vibration in neurorehabilitation.	/pubmed/24842220	Murillo N, Valls-Sole J, Vidal J, Opisso E, Medina J, Kumru H.	Eur J Phys Rehabil Med. 2014 Apr;50(2):231-42. Review.	Eur J Phys Rehabil Med. 2014	PubMed	citation	PMID:24842220	pubmed	24842220	create date:2014/05/21 | first author:Murillo N
Vibration therapy tolerated in children with Duchenne muscular dystrophy: a pilot study.	/pubmed/24830767	Myers KA, Ramage B, Khan A, Mah JK.	Pediatr Neurol. 2014 Jul;51(1):126-9. doi: 10.1016/j.pediatrneurol.2014.03.005. Epub 2014 Apr 4.	Pediatr Neurol. 2014	PubMed	citation	PMID:24830767	pubmed	24830767	create date:2014/05/17 | first author:Myers KA
Effects of whole-body vibration therapy on body functions and structures, activity, and participation poststroke: a systematic review.	/pubmed/24786940	Liao LR, Huang M, Lam FM, Pang MY.	Phys Ther. 2014 Sep;94(9):1232-51. doi: 10.2522/ptj.20130366. Epub 2014 May 1. Review.	Phys Ther. 2014	PubMed	citation	PMID:24786940	pubmed	24786940	create date:2014/05/03 | first author:Liao LR
Effects of vibration on spasticity in individuals with spinal cord injury: a scoping systematic review.	/pubmed/24743464	Sadeghi M, Sawatzky B.	Am J Phys Med Rehabil. 2014 Nov;93(11):995-1007. doi: 10.1097/PHM.0000000000000098. Review.	Am J Phys Med Rehabil. 2014	PubMed	citation	PMID:24743464	pubmed	24743464	create date:2014/04/20 | first author:Sadeghi M
Assisted movement with proprioceptive stimulation reduces impairment and restores function in incomplete spinal cord injury.	/pubmed/24685386	Backus D, Cordo P, Gillott A, Kandilakis C, Mori M, Raslan AM.	Arch Phys Med Rehabil. 2014 Aug;95(8):1447-53. doi: 10.1016/j.apmr.2014.03.011. Epub 2014 Mar 28.	Arch Phys Med Rehabil. 2014	PubMed	citation	PMID:24685386	pubmed	24685386	create date:2014/04/02 | first author:Backus D
Localized 100 Hz vibration improves function and reduces upper limb spasticity: a double-blind controlled study.	/pubmed/24651209	Casale R, Damiani C, Maestri R, Fundarò C, Chimento P, Foti C.	Eur J Phys Rehabil Med. 2014 Oct;50(5):495-504. Epub 2014 Mar 21.	Eur J Phys Rehabil Med. 2014	PubMed	citation	PMID:24651209	pubmed	24651209	create date:2014/03/22 | first author:Casale R
A new wide-diameter bone-anchored hearing implant-prospective 1-year data on complications, implant stability, and survival.	/pubmed/24608379	Foghsgaard S, Caye-Thomasen P.	Otol Neurotol. 2014 Aug;35(7):1238-41. doi: 10.1097/MAO.0000000000000345.	Otol Neurotol. 2014	PubMed	citation	PMID:24608379 | PMCID:PMC4136978	pubmed	24608379	create date:2014/03/13 | first author:Foghsgaard S
Feasibility of using whole body vibration as a means for controlling spasticity in post-stroke patients: a pilot study.	/pubmed/24439649	Miyara K, Matsumoto S, Uema T, Hirokawa T, Noma T, Shimodozono M, Kawahira K.	Complement Ther Clin Pract. 2014 Feb;20(1):70-3. doi: 10.1016/j.ctcp.2013.10.002. Epub 2013 Oct 10.	Complement Ther Clin Pract. 2014	PubMed	citation	PMID:24439649	pubmed	24439649	create date:2014/01/21 | first author:Miyara K
Effect of whole-body vibration on muscle strength and balance in diplegic cerebral palsy: a randomized controlled trial.	/pubmed/24434887	El-Shamy SM.	Am J Phys Med Rehabil. 2014 Feb;93(2):114-21. doi: 10.1097/PHM.0b013e3182a541a4.	Am J Phys Med Rehabil. 2014	PubMed	citation	PMID:24434887	pubmed	24434887	create date:2014/01/18 | first author:El-Shamy SM
The effectiveness of a single session of Whole-Body Vibration in improving the balance and the strength in type 2 diabetic patients with mild to moderate degree of peripheral neuropathy: a pilot study.	/pubmed/24411154	Kordi Yoosefinejad A, Shadmehr A, Olyaei G, Talebian S, Bagheri H.	J Bodyw Mov Ther. 2014 Jan;18(1):82-6. doi: 10.1016/j.jbmt.2013.10.007. Epub 2013 Nov 7.	J Bodyw Mov Ther. 2014	PubMed	citation	PMID:24411154	pubmed	24411154	create date:2014/01/15 | first author:Kordi Yoosefinejad A
A randomized pilot study of stochastic vibration therapy in spinocerebellar ataxia.	/pubmed/24197754	Kaut O, Jacobi H, Coch C, Prochnicki A, Minnerop M, Klockgether T, Wüllner U.	Cerebellum. 2014 Apr;13(2):237-42. doi: 10.1007/s12311-013-0532-5.	Cerebellum. 2014	PubMed	citation	PMID:24197754	pubmed	24197754	create date:2013/11/08 | first author:Kaut O
Whole-body vibration training in children with Duchenne muscular dystrophy and spinal muscular atrophy.	/pubmed/24157400	Vry J, Schubert IJ, Semler O, Haug V, Schönau E, Kirschner J.	Eur J Paediatr Neurol. 2014 Mar;18(2):140-9. doi: 10.1016/j.ejpn.2013.09.005. Epub 2013 Oct 11.	Eur J Paediatr Neurol. 2014	PubMed	citation	PMID:24157400	pubmed	24157400	create date:2013/10/26 | first author:Vry J
Responsiveness of muscle size and strength to physical training in very elderly people: a systematic review.	/pubmed/24151875	Stewart VH, Saunders DH, Greig CA.	Scand J Med Sci Sports. 2014 Feb;24(1):e1-10. doi: 10.1111/sms.12123. Epub 2013 Oct 24. Review.	Scand J Med Sci Sports. 2014	PubMed	citation	PMID:24151875	pubmed	24151875	create date:2013/10/25 | first author:Stewart VH
Diabetes, peripheral neuropathy, and lower-extremity function.	/pubmed/24120281	Chiles NS, Phillips CL, Volpato S, Bandinelli S, Ferrucci L, Guralnik JM, Patel KV.	J Diabetes Complications. 2014 Jan-Feb;28(1):91-5. doi: 10.1016/j.jdiacomp.2013.08.007. Epub 2013 Oct 11.	J Diabetes Complications. 2014	PubMed	citation	PMID:24120281 | PMCID:PMC3987662	pubmed	24120281	create date:2013/10/15 | first author:Chiles NS
Effects of intensive whole-body vibration training on muscle strength and balance in adults with chronic stroke: a randomized controlled pilot study.	/pubmed/24067865	Tankisheva E, Bogaerts A, Boonen S, Feys H, Verschueren S.	Arch Phys Med Rehabil. 2014 Mar;95(3):439-46. doi: 10.1016/j.apmr.2013.09.009. Epub 2013 Sep 22.	Arch Phys Med Rehabil. 2014	PubMed	citation	PMID:24067865	pubmed	24067865	create date:2013/09/27 | first author:Tankisheva E
The effect of vibrotactile feedback on postural sway during locomotor activities.	/pubmed/23938136	Sienko KH, Balkwill MD, Oddsson LI, Wall C 3rd.	J Neuroeng Rehabil. 2013 Aug 9;10:93. doi: 10.1186/1743-0003-10-93.	J Neuroeng Rehabil. 2013	PubMed	citation	PMID:23938136 | PMCID:PMC3751349	pubmed	23938136	create date:2013/08/14 | first author:Sienko KH
Leg muscle activity during whole-body vibration in individuals with chronic stroke.	/pubmed/23899891	Liao LR, Lam FM, Pang MY, Jones AY, Ng GY.	Med Sci Sports Exerc. 2014 Mar;46(3):537-45. doi: 10.1249/MSS.0b013e3182a6a006.	Med Sci Sports Exerc. 2014	PubMed	citation	PMID:23899891	pubmed	23899891	create date:2013/08/01 | first author:Liao LR
Effects of whole body vibration training on balance in adolescents with and without Down syndrome.	/pubmed/23872530	Villarroya MA, González-Agüero A, Moros T, Gómez-Trullén E, Casajús JA.	Res Dev Disabil. 2013 Oct;34(10):3057-65. doi: 10.1016/j.ridd.2013.06.015. Epub 2013 Jul 19.	Res Dev Disabil. 2013	PubMed	citation	PMID:23872530	pubmed	23872530	create date:2013/07/23 | first author:Villarroya MA
Combined rehabilitation program for postural instability in progressive supranuclear palsy.	/pubmed/23867411	Di Pancrazio L, Bellomo RG, Franciotti R, Iodice P, Galati V, D'Andreagiovanni A, Bifolchetti S, Thomas A, Onofrj M, Bonanni L, Saggini R.	NeuroRehabilitation. 2013;32(4):855-60. doi: 10.3233/NRE-130909.	NeuroRehabilitation. 2013	PubMed	citation	PMID:23867411	pubmed	23867411	create date:2013/07/23 | first author:Di Pancrazio L
A novel plantar stimulation technology for improving protective sensation and postural control in patients with diabetic peripheral neuropathy: a double-blinded, randomized study.	/pubmed/23860103	Najafi B, Crews RT, Wrobel JS.	Gerontology. 2013;59(5):473-80. doi: 10.1159/000352072. Epub 2013 Jul 16.	Gerontology. 2013	PubMed	citation	PMID:23860103	pubmed	23860103	create date:2013/07/19 | first author:Najafi B
Changes in body balance and functional performance following whole-body vibration training in patients with fibromyalgia syndrome: a randomized controlled trial.	/pubmed/23828124	Sañudo B, Carrasco L, de Hoyo M, Oliva-Pascual-Vaca Á, Rodríguez-Blanco C.	J Rehabil Med. 2013 Jul;45(7):678-84. doi: 10.2340/16501977-1174.	J Rehabil Med. 2013	PubMed	citation	PMID:23828124	pubmed	23828124	create date:2013/07/06 | first author:Sañudo B
Effect of a local vibration stimulus training programme on postural sway and gait in chronic stroke patients: a randomized controlled trial.	/pubmed/23818408	Lee SW, Cho KH, Lee WH.	Clin Rehabil. 2013 Oct;27(10):921-31. doi: 10.1177/0269215513485100. Epub 2013 Jul 1.	Clin Rehabil. 2013	PubMed	citation	PMID:23818408	pubmed	23818408	create date:2013/07/03 | first author:Lee SW
The role of first formant information in simulated electro-acoustic hearing.	/pubmed/23742378	Verschuur C, Boland C, Frost E, Constable J.	J Acoust Soc Am. 2013 Jun;133(6):4279-89. doi: 10.1121/1.4803910.	J Acoust Soc Am. 2013	PubMed	citation	PMID:23742378	pubmed	23742378	create date:2013/06/08 | first author:Verschuur C
Effects of whole-body vibration training on physical function in patients with multiple sclerosis.	/pubmed/23648620	Hilgers C, Mündermann A, Riehle H, Dettmers C.	NeuroRehabilitation. 2013;32(3):655-63. doi: 10.3233/NRE-130888.	NeuroRehabilitation. 2013	PubMed	citation	PMID:23648620	pubmed	23648620	create date:2013/05/08 | first author:Hilgers C
Segmental muscle vibration improves reaching movement in patients with chronic stroke. A randomized controlled trial.	/pubmed/23648613	Tavernese E, Paoloni M, Mangone M, Mandic V, Sale P, Franceschini M, Santilli V.	NeuroRehabilitation. 2013;32(3):591-9. doi: 10.3233/NRE-130881.	NeuroRehabilitation. 2013	PubMed	citation	PMID:23648613	pubmed	23648613	create date:2013/05/08 | first author:Tavernese E
Effects of whole-body vibration on muscle architecture, muscle strength, and balance in stroke patients: a randomized controlled trial.	/pubmed/23636085	Marín PJ, Ferrero CM, Menéndez H, Martín J, Herrero AJ.	Am J Phys Med Rehabil. 2013 Oct;92(10):881-8. doi: 10.1097/PHM.0b013e318292336c.	Am J Phys Med Rehabil. 2013	PubMed	citation	PMID:23636085	pubmed	23636085	create date:2013/05/03 | first author:Marín PJ
Addition of synchronous whole-body vibration to body mass resistive exercise causes little or no effects on muscle damage and inflammation.	/pubmed/23615482	Hazell TJ, Olver TD, Hamilton CD, Lemon PW.	J Strength Cond Res. 2014 Jan;28(1):53-60. doi: 10.1519/JSC.0b013e318296484f.	J Strength Cond Res. 2014	PubMed	citation	PMID:23615482	pubmed	23615482	create date:2013/04/26 | first author:Hazell TJ
Vibration perception threshold in relation to postural control and fall risk assessment in elderly.	/pubmed/23600710	de Mettelinge TR, Calders P, Palmans T, Vanden Bossche L, Van Den Noortgate N, Cambier D.	Disabil Rehabil. 2013 Sep;35(20):1712-7. doi: 10.3109/09638288.2012.751136. Epub 2013 Apr 19.	Disabil Rehabil. 2013	PubMed	citation	PMID:23600710	pubmed	23600710	create date:2013/04/23 | first author:de Mettelinge TR
Does giving segmental muscle vibration alter the response to botulinum toxin injections in the treatment of spasticity in people with multiple sclerosis? A single-blind randomized controlled trial.	/pubmed/23543344	Paoloni M, Giovannelli M, Mangone M, Leonardi L, Tavernese E, Di Pangrazio E, Bernetti A, Santilli V, Pozzilli C.	Clin Rehabil. 2013 Sep;27(9):803-12. doi: 10.1177/0269215513480956. Epub 2013 Mar 29.	Clin Rehabil. 2013	PubMed	citation	PMID:23543344	pubmed	23543344	create date:2013/04/02 | first author:Paoloni M
The effect of step-synchronized vibration on patients with Parkinson's disease: case studies on subjects with freezing of gait or an implanted deep brain stimulator.	/pubmed/23508270	Winfree KN, Pretzer-Aboff I, Hilgart D, Aggarwal R, Behari M, Agrawal SK.	IEEE Trans Neural Syst Rehabil Eng. 2013 Sep;21(5):806-11. doi: 10.1109/TNSRE.2013.2250308. Epub 2013 Mar 14.	IEEE Trans Neural Syst Rehabil Eng. 2013	PubMed	citation	PMID:23508270	pubmed	23508270	create date:2013/03/20 | first author:Winfree KN
Vibrotactile sensory substitution for electromyographic control of object manipulation.	/pubmed/23508245	Rombokas E, Stepp CE, Chang C, Malhotra M, Matsuoka Y.	IEEE Trans Biomed Eng. 2013 Aug;60(8):2226-32. doi: 10.1109/TBME.2013.2252174. Epub 2013 Mar 11.	IEEE Trans Biomed Eng. 2013	PubMed	citation	PMID:23508245	pubmed	23508245	create date:2013/03/20 | first author:Rombokas E
The effects of whole-body vibration therapy on bone turnover, muscle strength, motor function, and spasticity in chronic stroke: a randomized controlled trial.	/pubmed/23486302	Pang MY, Lau RW, Yip SP.	Eur J Phys Rehabil Med. 2013 Aug;49(4):439-50. Epub 2013 Mar 13.	Eur J Phys Rehabil Med. 2013	PubMed	citation	PMID:23486302	pubmed	23486302	create date:2013/03/15 | first author:Pang MY
Effect of a trunk-targeted intervention using vibration on posture and gait in children with spastic type cerebral palsy: a randomized control trial.	/pubmed/23477461	Unger M, Jelsma J, Stark C.	Dev Neurorehabil. 2013;16(2):79-88. doi: 10.3109/17518423.2012.715313.	Dev Neurorehabil. 2013	PubMed	citation	PMID:23477461	pubmed	23477461	create date:2013/03/13 | first author:Unger M
Subacute combined degeneration of the spinal cord following recreational nitrous oxide use.	/pubmed/23476009	Cheng HM, Park JH, Hernstadt D.	BMJ Case Rep. 2013 Mar 8;2013. pii: bcr2012008509. doi: 10.1136/bcr-2012-008509.	BMJ Case Rep. 2013	PubMed	citation	PMID:23476009 | PMCID:PMC3618752	pubmed	23476009	create date:2013/03/12 | first author:Cheng HM
Proprioceptive changes impair balance control in individuals with chronic obstructive pulmonary disease.	/pubmed/23469255	Janssens L, Brumagne S, McConnell AK, Claeys K, Pijnenburg M, Burtin C, Janssens W, Decramer M, Troosters T.	PLoS One. 2013;8(3):e57949. doi: 10.1371/journal.pone.0057949. Epub 2013 Mar 1.	PLoS One. 2013	PubMed	citation	PMID:23469255 | PMCID:PMC3585868	pubmed	23469255	create date:2013/03/08 | first author:Janssens L
Non pharmacological interventions for spasticity in multiple sclerosis.	/pubmed/23450612	Amatya B, Khan F, La Mantia L, Demetrios M, Wade DT.	Cochrane Database Syst Rev. 2013 Feb 28;(2):CD009974. doi: 10.1002/14651858.CD009974.pub2. Review.	Cochrane Database Syst Rev. 2013	PubMed	citation	PMID:23450612	pubmed	23450612	create date:2013/03/02 | first author:Amatya B
The effect of vibration therapy on spasticity and motor function in children with cerebral palsy: a randomized controlled trial.	/pubmed/23422453	Katusic A, Alimovic S, Mejaski-Bosnjak V.	NeuroRehabilitation. 2013;32(1):1-8. doi: 10.3233/NRE-130817.	NeuroRehabilitation. 2013	PubMed	citation	PMID:23422453	pubmed	23422453	create date:2013/02/21 | first author:Katusic A
An untethered shoe with vibratory feedback for improving gait of Parkinson's patients: the PDShoe.	/pubmed/23366113	Winfree KN, Pretzer-Aboff I, Hilgart D, Aggarwal R, Behari M, Agrawal S.	Conf Proc IEEE Eng Med Biol Soc. 2012;2012:1202-5. doi: 10.1109/EMBC.2012.6346152.	Conf Proc IEEE Eng Med Biol Soc. 2012	PubMed	citation	PMID:23366113	pubmed	23366113	create date:2013/02/01 | first author:Winfree KN
Self-triggered assistive stimulus training improves step initiation in persons with Parkinson's disease.	/pubmed/23363975	Creath RA, Prettyman M, Shulman L, Hilliard M, Martinez K, MacKinnon CD, Mille ML, Simuni T, Zhang J, Rogers MW.	J Neuroeng Rehabil. 2013 Jan 30;10:11. doi: 10.1186/1743-0003-10-11. Review.	J Neuroeng Rehabil. 2013	PubMed	citation	PMID:23363975 | PMCID:PMC3570362	pubmed	23363975	create date:2013/02/01 | first author:Creath RA
Functioning of peripheral Ia pathways in infants with myelomeningocele.	/pubmed/23318347	Lee D, Teulier C, Ulrich BD, Martin B.	Infant Behav Dev. 2013 Feb;36(1):147-61. doi: 10.1016/j.infbeh.2012.11.005. Epub 2013 Jan 12.	Infant Behav Dev. 2013	PubMed	citation	PMID:23318347	pubmed	23318347	create date:2013/01/16 | first author:Lee D
Effect of vibration stimulation on dysbasia of spastic paraplegia in neuromyelitis optica: a possible example of neuronal plasticity.	/pubmed/23045444	Lin HN, Nagaoka M, Hayashi Y, Hatori K.	BMJ Case Rep. 2012 Oct 6;2012. pii: bcr2012006793. doi: 10.1136/bcr-2012-006793.	BMJ Case Rep. 2012	PubMed	citation	PMID:23045444 | PMCID:PMC4543993	pubmed	23045444	create date:2012/10/10 | first author:Lin HN
Effects of a single session of whole body vibration on ankle plantarflexion spasticity and gait performance in patients with chronic stroke: a randomized controlled trial.	/pubmed/23035004	Chan KS, Liu CW, Chen TW, Weng MC, Huang MH, Chen CH.	Clin Rehabil. 2012 Dec;26(12):1087-95. doi: 10.1177/0269215512446314. Epub 2012 Oct 3.	Clin Rehabil. 2012	PubMed	citation	PMID:23035004	pubmed	23035004	create date:2012/10/05 | first author:Chan KS
Determining the preferred modality for real-time biofeedback during balance training.	/pubmed/23022157	Bechly KE, Carender WJ, Myles JD, Sienko KH.	Gait Posture. 2013 Mar;37(3):391-6. doi: 10.1016/j.gaitpost.2012.08.007. Epub 2012 Sep 28.	Gait Posture. 2013	PubMed	citation	PMID:23022157	pubmed	23022157	create date:2012/10/02 | first author:Bechly KE
Subjective experiences of men with and without spinal cord injury: tolerability of the juvent and WAVE whole body vibration plates.	/pubmed/22981004	Hadi SC, Delparte JJ, Hitzig SL, Craven BC.	PM R. 2012 Dec;4(12):954-62. doi: 10.1016/j.pmrj.2012.07.006. Epub 2012 Sep 12.	PM R. 2012	PubMed	citation	PMID:22981004	pubmed	22981004	create date:2012/09/18 | first author:Hadi SC
Action-contingent vibrotactile flow facilitates the detection of ground level obstacles with a partly virtual sensory substitution device.	/pubmed/22939849	Díaz A, Barrientos A, Jacobs DM, Travieso D.	Hum Mov Sci. 2012 Dec;31(6):1571-84. doi: 10.1016/j.humov.2012.05.006. Epub 2012 Aug 30.	Hum Mov Sci. 2012	PubMed	citation	PMID:22939849	pubmed	22939849	create date:2012/09/04 | first author:Díaz A
Vibrotactile neurofeedback balance training in patients with Parkinson's disease: reducing the number of falls.	/pubmed/22841586	Rossi-Izquierdo M, Ernst A, Soto-Varela A, Santos-Pérez S, Faraldo-García A, Sesar-Ignacio A, Basta D.	Gait Posture. 2013 Feb;37(2):195-200. doi: 10.1016/j.gaitpost.2012.07.002. Epub 2012 Jul 28.	Gait Posture. 2013	PubMed	citation	PMID:22841586	pubmed	22841586	create date:2012/07/31 | first author:Rossi-Izquierdo M
Upper extremity function and its relation with hand sensation and upper extremity strength in patients with multiple sclerosis.	/pubmed/22672953	Guclu-Gunduz A, Citaker S, Nazliel B, Irkec C.	NeuroRehabilitation. 2012;30(4):369-74. doi: 10.3233/NRE-2012-0768.	NeuroRehabilitation. 2012	PubMed	citation	PMID:22672953	pubmed	22672953	create date:2012/06/08 | first author:Guclu-Gunduz A
The vibratory stimulus as a neurorehabilitation tool for stroke patients: proof of concept and tolerability test.	/pubmed/22672942	Bento VF, Cruz VT, Ribeiro DD, Cunha JP.	NeuroRehabilitation. 2012;30(4):287-93. doi: 10.3233/NRE-2012-0757.	NeuroRehabilitation. 2012	PubMed	citation	PMID:22672942	pubmed	22672942	create date:2012/06/08 | first author:Bento VF
Sensory nerve action potentials and sensory perception in women with arthritis of the hand.	/pubmed/22575001	Calder KM, Martin A, Lydiate J, MacDermid JC, Galea V, MacIntyre NJ.	J Neuroeng Rehabil. 2012 May 10;9:27. doi: 10.1186/1743-0003-9-27.	J Neuroeng Rehabil. 2012	PubMed	citation	PMID:22575001 | PMCID:PMC3480934	pubmed	22575001	create date:2012/05/12 | first author:Calder KM
Principles of brain plasticity in improving sensorimotor function of the knee and leg in patients with anterior cruciate ligament injury: a double-blind randomized exploratory trial.	/pubmed/22574814	Ageberg E, Björkman A, Rosén B, Roos EM.	BMC Musculoskelet Disord. 2012 May 10;13:68. doi: 10.1186/1471-2474-13-68.	BMC Musculoskelet Disord. 2012	PubMed	citation	PMID:22574814 | PMCID:PMC3441769	pubmed	22574814	create date:2012/05/12 | first author:Ageberg E
Strength: a relevant link to functional performance in the neurodegenerative disease of adrenomyeloneuropathy.	/pubmed/22544816	Keller JL, Wang JI, Kang JY, Hanson JA, Kamath P, Swain JO, Raymond GV, Zackowski KM.	Neurorehabil Neural Repair. 2012 Nov-Dec;26(9):1080-8. doi: 10.1177/1545968312441682. Epub 2012 Apr 27.	Neurorehabil Neural Repair. 2012	PubMed	citation	PMID:22544816	pubmed	22544816	create date:2012/05/01 | first author:Keller JL
Modifications of the Epley (canalith repositioning) manoeuvre for posterior canal benign paroxysmal positional vertigo (BPPV).	/pubmed/22513962	Hunt WT, Zimmermann EF, Hilton MP.	Cochrane Database Syst Rev. 2012 Apr 18;(4):CD008675. doi: 10.1002/14651858.CD008675.pub2. Review.	Cochrane Database Syst Rev. 2012	PubMed	citation	PMID:22513962	pubmed	22513962	create date:2012/04/20 | first author:Hunt WT
Focal muscle vibration in the treatment of upper limb spasticity: a pilot randomized controlled trial in patients with chronic stroke.	/pubmed/22507444	Caliandro P, Celletti C, Padua L, Minciotti I, Russo G, Granata G, La Torre G, Granieri E, Camerota F.	Arch Phys Med Rehabil. 2012 Sep;93(9):1656-61. doi: 10.1016/j.apmr.2012.04.002. Epub 2012 Apr 13.	Arch Phys Med Rehabil. 2012	PubMed	citation	PMID:22507444	pubmed	22507444	create date:2012/04/18 | first author:Caliandro P
Effects of ankle proprioceptive interference on locomotion after stroke.	/pubmed/22503933	Lin SI, Hsu LJ, Wang HC.	Arch Phys Med Rehabil. 2012 Jun;93(6):1027-33. doi: 10.1016/j.apmr.2012.01.019. Epub 2012 Apr 13.	Arch Phys Med Rehabil. 2012	PubMed	citation	PMID:22503933	pubmed	22503933	create date:2012/04/17 | first author:Lin SI
To what extent can multimorbidity be viewed as a determinant of postural control in stroke patients?	/pubmed/22464737	Spruit-van Eijk M, Zuidema SU, Buijck BI, Koopmans RT, Geurts AC.	Arch Phys Med Rehabil. 2012 Jun;93(6):1021-6. doi: 10.1016/j.apmr.2012.01.004. Epub 2012 Mar 30.	Arch Phys Med Rehabil. 2012	PubMed	citation	PMID:22464737	pubmed	22464737	create date:2012/04/03 | first author:Spruit-van Eijk M
Postural control under visual and proprioceptive perturbations during double and single limb stances: insights for balance training.	/pubmed/22464121	Hazime FA, Allard P, Ide MR, Siqueira CM, Amorim CF, Tanaka C.	J Bodyw Mov Ther. 2012 Apr;16(2):224-9. doi: 10.1016/j.jbmt.2011.02.003. Epub 2011 Apr 9.	J Bodyw Mov Ther. 2012	PubMed	citation	PMID:22464121	pubmed	22464121	create date:2012/04/03 | first author:Hazime FA
Short-duration resistive exercise sustains neuromuscular function after bed rest.	/pubmed/22460472	Gast U, John S, Runge M, Rawer R, Felsenberg D, Belavý DL.	Med Sci Sports Exerc. 2012 Sep;44(9):1764-72. doi: 10.1249/MSS.0b013e318256b53b.	Med Sci Sports Exerc. 2012	PubMed	citation	PMID:22460472	pubmed	22460472	create date:2012/03/31 | first author:Gast U
Weight bearing through lower limbs in a standing frame with and without arm support and low-magnitude whole-body vibration in men and women with complete motor paraplegia.	/pubmed/22407161	Bernhardt KA, Beck LA, Lamb JL, Kaufman KR, Amin S, Wuermser LA.	Am J Phys Med Rehabil. 2012 Apr;91(4):300-8. doi: 10.1097/PHM.0b013e31824aab03.	Am J Phys Med Rehabil. 2012	PubMed	citation	PMID:22407161 | PMCID:PMC3913065	pubmed	22407161	create date:2012/03/13 | first author:Bernhardt KA
Anti-spastic effects of the direct application of vibratory stimuli to the spastic muscles of hemiplegic limbs in post-stroke patients: a proof-of-principle study.	/pubmed/22402727	Noma T, Matsumoto S, Shimodozono M, Etoh S, Kawahira K.	J Rehabil Med. 2012 Apr;44(4):325-30. doi: 10.2340/16501977-0946.	J Rehabil Med. 2012	PubMed	citation	PMID:22402727	pubmed	22402727	create date:2012/03/10 | first author:Noma T
Effect of whole body vibration on leg muscle strength after healed burns: a randomized controlled trial.	/pubmed/22386977	Ebid AA, Ahmed MT, Mahmoud Eid M, Mohamed MS.	Burns. 2012 Nov;38(7):1019-26. doi: 10.1016/j.burns.2012.02.006. Epub 2012 Mar 3.	Burns. 2012	PubMed	citation	PMID:22386977	pubmed	22386977	create date:2012/03/06 | first author:Ebid AA
Whole-body vibration training for patients with neurodegenerative disease.	/pubmed/22336858	Sitjà Rabert M, Rigau Comas D, Fort Vanmeerhaeghe A, Santoyo Medina C, Roqué i Figuls M, Romero-Rodríguez D, Bonfill Cosp X.	Cochrane Database Syst Rev. 2012 Feb 15;(2):CD009097. doi: 10.1002/14651858.CD009097.pub2. Review.	Cochrane Database Syst Rev. 2012	PubMed	citation	PMID:22336858	pubmed	22336858	create date:2012/02/18 | first author:Sitjà Rabert M
Whole-body vibration has no effect on neuromotor function and falls in chronic stroke.	/pubmed/22330025	Lau RW, Yip SP, Pang MY.	Med Sci Sports Exerc. 2012 Aug;44(8):1409-18. doi: 10.1249/MSS.0b013e31824e4f8c.	Med Sci Sports Exerc. 2012	PubMed	citation	PMID:22330025	pubmed	22330025	create date:2012/02/15 | first author:Lau RW
Vibration elicits involuntary, step-like behavior in individuals with spinal cord injury.	/pubmed/22328683	Field-Fote E, Ness LL, Ionno M.	Neurorehabil Neural Repair. 2012 Sep;26(7):861-9. doi: 10.1177/1545968311433603. Epub 2012 Feb 9.	Neurorehabil Neural Repair. 2012	PubMed	citation	PMID:22328683	pubmed	22328683	create date:2012/02/14 | first author:Field-Fote E
Effect of whole-body vibration exercise on balance in women with fibromyalgia syndrome: a randomized controlled trial.	/pubmed/22321155	Sañudo B, de Hoyo M, Carrasco L, Rodríguez-Blanco C, Oliva-Pascual-Vaca A, McVeigh JG.	J Altern Complement Med. 2012 Feb;18(2):158-64. doi: 10.1089/acm.2010.0881. Epub 2012 Feb 9.	J Altern Complement Med. 2012	PubMed	citation	PMID:22321155	pubmed	22321155	create date:2012/02/11 | first author:Sañudo B
Physical modalities in the treatment of neurological dysfunction.	/pubmed/22296649	Galea MP.	Clin Neurol Neurosurg. 2012 Jun;114(5):483-8. doi: 10.1016/j.clineuro.2012.01.009. Epub 2012 Jan 31. Review.	Clin Neurol Neurosurg. 2012	PubMed	citation	PMID:22296649	pubmed	22296649	create date:2012/02/03 | first author:Galea MP
No specific effect of whole-body vibration training in chronic stroke: a double-blind randomized controlled study.	/pubmed/22289234	Brogårdh C, Flansbjer UB, Lexell J.	Arch Phys Med Rehabil. 2012 Feb;93(2):253-8. doi: 10.1016/j.apmr.2011.09.005.	Arch Phys Med Rehabil. 2012	PubMed	citation	PMID:22289234	pubmed	22289234	create date:2012/02/01 | first author:Brogårdh C
Using whole-body vibration training in patients affected with common neurological diseases: a systematic literature review.	/pubmed/22233167	del Pozo-Cruz B, Adsuar JC, Parraca JA, del Pozo-Cruz J, Olivares PR, Gusi N.	J Altern Complement Med. 2012 Jan;18(1):29-41. doi: 10.1089/acm.2010.0691. Epub 2012 Jan 10.	J Altern Complement Med. 2012	PubMed	citation	PMID:22233167	pubmed	22233167	create date:2012/01/12 | first author:del Pozo-Cruz B
Whole-body vibration influences lower extremity circulatory and neurological function.	/pubmed/22107331	Games KE, Sefton JM.	Scand J Med Sci Sports. 2013 Aug;23(4):516-23. doi: 10.1111/j.1600-0838.2011.01419.x. Epub 2011 Nov 23.	Scand J Med Sci Sports. 2013	PubMed	citation	PMID:22107331	pubmed	22107331	create date:2011/11/24 | first author:Games KE
Effects of 3 weeks' whole body vibration training on muscle strength and functional mobility in hospitalized persons with multiple sclerosis.	/pubmed/22084490	Claerbout M, Gebara B, Ilsbroukx S, Verschueren S, Peers K, Van Asch P, Feys P.	Mult Scler. 2012 Apr;18(4):498-505. doi: 10.1177/1352458511423267. Epub 2011 Nov 14.	Mult Scler. 2012	PubMed	citation	PMID:22084490	pubmed	22084490	create date:2011/11/16 | first author:Claerbout M
Exercise for improving balance in older people.	/pubmed/22071817	Howe TE, Rochester L, Neil F, Skelton DA, Ballinger C.	Cochrane Database Syst Rev. 2011 Nov 9;(11):CD004963. doi: 10.1002/14651858.CD004963.pub3. Review.	Cochrane Database Syst Rev. 2011	PubMed	citation	PMID:22071817	pubmed	22071817	create date:2011/11/11 | first author:Howe TE
Preliminary evidence of focal muscle vibration effects on spasticity due to cerebral palsy in a small sample of Italian children.	/pubmed/22041808	Celletti C, Camerota F.	Clin Ter. 2011;162(5):e125-8.	Clin Ter. 2011	PubMed	citation	PMID:22041808	pubmed	22041808	create date:2011/11/02 | first author:Celletti C
Is 8 weeks of side-alternating whole-body vibration a safe and acceptable modality to improve functional performance in multiple sclerosis?	/pubmed/21992525	Mason RR, Cochrane DJ, Denny GJ, Firth EC, Stannard SR.	Disabil Rehabil. 2012;34(8):647-54. doi: 10.3109/09638288.2011.615370. Epub 2011 Oct 12.	Disabil Rehabil. 2012	PubMed	citation	PMID:21992525	pubmed	21992525	create date:2011/10/14 | first author:Mason RR
Increased plantar foot pressure in persons affected by leprosy.	/pubmed/21964052	Slim FJ, van Schie CH, Keukenkamp R, Faber WR, Nollet F.	Gait Posture. 2012 Feb;35(2):218-24. doi: 10.1016/j.gaitpost.2011.09.010. Epub 2011 Oct 2.	Gait Posture. 2012	PubMed	citation	PMID:21964052	pubmed	21964052	create date:2011/10/04 | first author:Slim FJ
The effects of vibration therapy on muscle force loss following eccentrically induced muscle damage.	/pubmed/21750975	Barnes MJ, Perry BG, Mündel T, Cochrane DJ.	Eur J Appl Physiol. 2012 Mar;112(3):1189-94. doi: 10.1007/s00421-011-2064-3. Epub 2011 Jul 13.	Eur J Appl Physiol. 2012	PubMed	citation	PMID:21750975	pubmed	21750975	create date:2011/07/14 | first author:Barnes MJ
Proprioceptive deficits in Parkinson's disease patients with freezing of gait.	/pubmed/21745543	Tan T, Almeida QJ, Rahimi F.	Neuroscience. 2011 Sep 29;192:746-52. doi: 10.1016/j.neuroscience.2011.06.071. Epub 2011 Jul 1.	Neuroscience. 2011	PubMed	citation	PMID:21745543	pubmed	21745543	create date:2011/07/13 | first author:Tan T
Stochastic resonance therapy in Parkinson's disease.	/pubmed/21725168	Kaut O, Allert N, Coch C, Paus S, Grzeska A, Minnerop M, Wüllner U.	NeuroRehabilitation. 2011;28(4):353-8. doi: 10.3233/NRE-2011-0663.	NeuroRehabilitation. 2011	PubMed	citation	PMID:21725168	pubmed	21725168	create date:2011/07/05 | first author:Kaut O
Relationship between foot sensation and standing balance in patients with multiple sclerosis.	/pubmed/21683600	Citaker S, Gunduz AG, Guclu MB, Nazliel B, Irkec C, Kaya D.	Gait Posture. 2011 Jun;34(2):275-8. doi: 10.1016/j.gaitpost.2011.05.015. Epub 2011 Jun 16.	Gait Posture. 2011	PubMed	citation	PMID:21683600	pubmed	21683600	create date:2011/06/21 | first author:Citaker S
Effects of vibrotactile stimulation on the control of muscle tone and movement facilitation in children with cerebral injury.	/pubmed/21648312	Katusić A, Mejaski-Bosnjak V.	Coll Antropol. 2011 Jan;35 Suppl 1:57-63.	Coll Antropol. 2011	PubMed	citation	PMID:21648312	pubmed	21648312	create date:2011/06/09 | first author:Katusić A
Combined whole body vibration and balance training using Vibrosphere®: improvement of trunk stability, muscle tone, and postural control in stroke patients during early geriatric rehabilitation.	/pubmed/21505939	Merkert J, Butz S, Nieczaj R, Steinhagen-Thiessen E, Eckardt R.	Z Gerontol Geriatr. 2011 Aug;44(4):256-61. doi: 10.1007/s00391-011-0170-9.	Z Gerontol Geriatr. 2011	PubMed	citation	PMID:21505939	pubmed	21505939	create date:2011/04/21 | first author:Merkert J
Rapidly emerging role of whole body vibration therapy in the management of neurologic diseases besides polio.	/pubmed/21440715	Kapoor S.	Arch Phys Med Rehabil. 2011 Apr;92(4):677; author reply 677-8. doi: 10.1016/j.apmr.2010.11.020. No abstract available.	Arch Phys Med Rehabil. 2011	PubMed	citation	PMID:21440715	pubmed	21440715	create date:2011/03/29 | first author:Kapoor S
Acute effects of whole-body vibration at 3, 6, and 9 hz on balance and gait in patients with Parkinson's disease.	/pubmed/21425338	Chouza M, Arias P, Viñas S, Cudeiro J.	Mov Disord. 2011 Apr;26(5):920-1. doi: 10.1002/mds.23582. Epub 2011 Mar 21. No abstract available.	Mov Disord. 2011	PubMed	citation	PMID:21425338	pubmed	21425338	create date:2011/03/23 | first author:Chouza M
Effectiveness of low-frequency vibration recovery method on blood lactate removal, muscle contractile properties and on time to exhaustion during cycling at VO₂max power output.	/pubmed/21327798	Carrasco L, Sañudo B, de Hoyo M, Pradas F, Da Silva ME.	Eur J Appl Physiol. 2011 Sep;111(9):2271-9. doi: 10.1007/s00421-011-1848-9. Epub 2011 Feb 17.	Eur J Appl Physiol. 2011	PubMed	citation	PMID:21327798	pubmed	21327798	create date:2011/02/18 | first author:Carrasco L
Vibration-induced effects in stroke patients with spastic hemiparesis--a pilot study.	/pubmed/21209488	Liepert J, Binder C.	Restor Neurol Neurosci. 2010;28(6):729-35. doi: 10.3233/RNN-2010-0541.	Restor Neurol Neurosci. 2010	PubMed	citation	PMID:21209488	pubmed	21209488	create date:2011/01/07 | first author:Liepert J
Decrease of spasticity with muscle vibration in patients with spinal cord injury.	/pubmed/21172739	Murillo N, Kumru H, Vidal-Samso J, Benito J, Medina J, Navarro X, Valls-Sole J.	Clin Neurophysiol. 2011 Jun;122(6):1183-9. doi: 10.1016/j.clinph.2010.11.012. Epub 2010 Dec 18.	Clin Neurophysiol. 2011	PubMed	citation	PMID:21172739	pubmed	21172739	create date:2010/12/22 | first author:Murillo N
The effect of 6-week exercise programme and whole body vibration on strength and quality of life in women with fibromyalgia: a randomised study.	/pubmed/21122265	Sañudo B, de Hoyo M, Carrasco L, McVeigh JG, Corral J, Cabeza R, Rodríguez C, Oliva A.	Clin Exp Rheumatol. 2010 Nov-Dec;28(6 Suppl 63):S40-5. Epub 2010 Dec 22.	Clin Exp Rheumatol. 2010	PubMed	citation	PMID:21122265	pubmed	21122265	create date:2010/12/03 | first author:Sañudo B
Jerk analysis of active body-weight-transfer.	/pubmed/20940098	Baldinotti I, Timmann D, Kolb FP, Kutz DF.	Gait Posture. 2010 Oct;32(4):667-72. doi: 10.1016/j.gaitpost.2010.08.011.	Gait Posture. 2010	PubMed	citation	PMID:20940098	pubmed	20940098	create date:2010/10/14 | first author:Baldinotti I
Effects of wrist tendon vibration on targeted upper-arm movements in poststroke hemiparesis.	/pubmed/20921324	Conrad MO, Scheidt RA, Schmit BD.	Neurorehabil Neural Repair. 2011 Jan;25(1):61-70. doi: 10.1177/1545968310378507. Epub 2010 Oct 4.	Neurorehabil Neural Repair. 2011	PubMed	citation	PMID:20921324	pubmed	20921324	create date:2010/10/06 | first author:Conrad MO
Exploring the effects of a 20-week whole-body vibration training programme on leg muscle performance and function in persons with multiple sclerosis.	/pubmed/20878048	Broekmans T, Roelants M, Alders G, Feys P, Thijs H, Eijnde BO.	J Rehabil Med. 2010 Oct;42(9):866-72. doi: 10.2340/16501977-0609.	J Rehabil Med. 2010	PubMed	citation	PMID:20878048	pubmed	20878048	create date:2010/09/30 | first author:Broekmans T
Long-term effects on cortical excitability and motor recovery induced by repeated muscle vibration in chronic stroke patients.	/pubmed/20834043	Marconi B, Filippi GM, Koch G, Giacobbe V, Pecchioli C, Versace V, Camerota F, Saraceni VM, Caltagirone C.	Neurorehabil Neural Repair. 2011 Jan;25(1):48-60. doi: 10.1177/1545968310376757. Epub 2010 Sep 12.	Neurorehabil Neural Repair. 2011	PubMed	citation	PMID:20834043	pubmed	20834043	create date:2010/09/14 | first author:Marconi B
Decreased variability in postural control strategies in young people with non-specific low back pain is associated with altered proprioceptive reweighting.	/pubmed/20824281	Claeys K, Brumagne S, Dankaerts W, Kiers H, Janssens L.	Eur J Appl Physiol. 2011 Jan;111(1):115-23. doi: 10.1007/s00421-010-1637-x. Epub 2010 Sep 8.	Eur J Appl Physiol. 2011	PubMed	citation	PMID:20824281	pubmed	20824281	create date:2010/09/09 | first author:Claeys K
No effects of whole-body vibration training on muscle strength and gait performance in persons with late effects of polio: a pilot study.	/pubmed/20801271	Brogårdh C, Flansbjer UB, Lexell J.	Arch Phys Med Rehabil. 2010 Sep;91(9):1474-7. doi: 10.1016/j.apmr.2010.06.024.	Arch Phys Med Rehabil. 2010	PubMed	citation	PMID:20801271	pubmed	20801271	create date:2010/08/31 | first author:Brogårdh C
Effects of whole body vibration on strength and functional mobility in multiple sclerosis.	/pubmed/20658923	Wunderer K, Schabrun SM, Chipchase LS.	Physiother Theory Pract. 2010 Aug;26(6):374-84. doi: 10.3109/09593980903147384.	Physiother Theory Pract. 2010	PubMed	citation	PMID:20658923	pubmed	20658923	create date:2010/07/28 | first author:Wunderer K
Acute effects of whole body vibration during passive standing on soleus H-reflex in subjects with and without spinal cord injury.	/pubmed/20633603	Sayenko DG, Masani K, Alizadeh-Meghrazi M, Popovic MR, Craven BC.	Neurosci Lett. 2010 Sep 20;482(1):66-70. doi: 10.1016/j.neulet.2010.07.009. Epub 2010 Jul 13.	Neurosci Lett. 2010	PubMed	citation	PMID:20633603	pubmed	20633603	create date:2010/07/17 | first author:Sayenko DG
Whole body vibration compared to conventional physiotherapy in patients with gonarthrosis: a protocol for a randomized, controlled study.	/pubmed/20565956	Stein G, Knoell P, Faymonville C, Kaulhausen T, Siewe J, Otto C, Eysel P, Zarghooni K.	BMC Musculoskelet Disord. 2010 Jun 21;11:128. doi: 10.1186/1471-2474-11-128.	BMC Musculoskelet Disord. 2010	PubMed	citation	PMID:20565956 | PMCID:PMC2903508	pubmed	20565956	create date:2010/06/23 | first author:Stein G
Tripod pinch strength and thumb opposition are the major determinants of manual dexterity in Charcot-Marie-Tooth disease type 1A.	/pubmed/20562406	Videler AJ, Beelen A, van Schaik IN, Verhamme C, van den Berg LH, de Visser M, Nollet F.	J Neurol Neurosurg Psychiatry. 2010 Aug;81(8):828-33. doi: 10.1136/jnnp.2009.187302. Epub 2010 Jun 18.	J Neurol Neurosurg Psychiatry. 2010	PubMed	citation	PMID:20562406	pubmed	20562406	create date:2010/06/22 | first author:Videler AJ
Low resonance frequency vibration affects strength of paretic and non-paretic leg differently in patients with stroke.	/pubmed/20511126	Tihanyi J, Di Giminiani R, Tihanyi T, Gyulai G, Trzaskoma L, Horváth M.	Acta Physiol Hung. 2010 Jun;97(2):172-82. doi: 10.1556/APhysiol.97.2010.2.3.	Acta Physiol Hung. 2010	PubMed	citation	PMID:20511126	pubmed	20511126	create date:2010/06/01 | first author:Tihanyi J
Effect of whole-body vibration on neuromuscular performance and body composition for females 65 years and older: a randomized-controlled trial.	/pubmed/20500555	von Stengel S, Kemmler W, Engelke K, Kalender WA.	Scand J Med Sci Sports. 2012 Feb;22(1):119-27. doi: 10.1111/j.1600-0838.2010.01126.x. Epub 2010 May 24.	Scand J Med Sci Sports. 2012	PubMed	citation	PMID:20500555	pubmed	20500555	create date:2010/05/27 | first author:von Stengel S
The effect of inspiratory muscles fatigue on postural control in people with and without recurrent low back pain.	/pubmed/20393397	Janssens L, Brumagne S, Polspoel K, Troosters T, McConnell A.	Spine (Phila Pa 1976). 2010 May 1;35(10):1088-94. doi: 10.1097/BRS.0b013e3181bee5c3.	Spine (Phila Pa 1976). 2010	PubMed	citation	PMID:20393397	pubmed	20393397	create date:2010/04/16 | first author:Janssens L
Tilt vibratory exercise and the dynamic balance in fibromyalgia: A randomized controlled trial.	/pubmed/20235191	Gusi N, Parraca JA, Olivares PR, Leal A, Adsuar JC.	Arthritis Care Res (Hoboken). 2010 Aug;62(8):1072-8. doi: 10.1002/acr.20180.	Arthritis Care Res (Hoboken). 2010	PubMed	citation	PMID:20235191	pubmed	20235191	create date:2010/03/18 | first author:Gusi N
Postural instability in Charcot-Marie-Tooth type 1A patients is strongly associated with reduced somatosensation.	/pubmed/20226674	van der Linden MH, van der Linden SC, Hendricks HT, van Engelen BG, Geurts AC.	Gait Posture. 2010 Apr;31(4):483-8. doi: 10.1016/j.gaitpost.2010.02.005. Epub 2010 Mar 11.	Gait Posture. 2010	PubMed	citation	PMID:20226674	pubmed	20226674	create date:2010/03/17 | first author:van der Linden MH
Validity of clinically derived cumulative somatosensory impairment index.	/pubmed/20159126	Deshpande N, Metter EJ, Ferrucci L.	Arch Phys Med Rehabil. 2010 Feb;91(2):226-32. doi: 10.1016/j.apmr.2009.10.006.	Arch Phys Med Rehabil. 2010	PubMed	citation	PMID:20159126 | PMCID:PMC2856325	pubmed	20159126	create date:2010/02/18 | first author:Deshpande N
Effect of whole-body vibration on quadriceps spasticity in individuals with spastic hypertonia due to spinal cord injury.	/pubmed/20042786	Ness LL, Field-Fote EC.	Restor Neurol Neurosci. 2009;27(6):621-31. doi: 10.3233/RNN-2009-0487.	Restor Neurol Neurosci. 2009	PubMed	citation	PMID:20042786	pubmed	20042786	create date:2010/01/01 | first author:Ness LL
Short-term effects of vibration therapy on motor impairments in Parkinson's disease.	/pubmed/20037223	King LK, Almeida QJ, Ahonen H.	NeuroRehabilitation. 2009;25(4):297-306. doi: 10.3233/NRE-2009-0528.	NeuroRehabilitation. 2009	PubMed	citation	PMID:20037223	pubmed	20037223	create date:2009/12/29 | first author:King LK
A novel vibration device for neuromuscular stimulation for sports and rehabilitation applications.	/pubmed/19964248	Pujari AN, Neilson RD, Cardinale M.	Conf Proc IEEE Eng Med Biol Soc. 2009;2009:839-44. doi: 10.1109/IEMBS.2009.5333675.	Conf Proc IEEE Eng Med Biol Soc. 2009	PubMed	citation	PMID:19964248	pubmed	19964248	create date:2009/12/08 | first author:Pujari AN
Alternate rhythmic vibratory stimulation of trunk muscles affects walking cadence and velocity in Parkinson's disease.	/pubmed/19955020	De Nunzio AM, Grasso M, Nardone A, Godi M, Schieppati M.	Clin Neurophysiol. 2010 Feb;121(2):240-7. doi: 10.1016/j.clinph.2009.10.018. Epub 2009 Dec 1.	Clin Neurophysiol. 2010	PubMed	citation	PMID:19955020	pubmed	19955020	create date:2009/12/04 | first author:De Nunzio AM
Segmental muscle vibration improves walking in chronic stroke patients with foot drop: a randomized controlled trial.	/pubmed/19855076	Paoloni M, Mangone M, Scettri P, Procaccianti R, Cometa A, Santilli V.	Neurorehabil Neural Repair. 2010 Mar-Apr;24(3):254-62. doi: 10.1177/1545968309349940. Epub 2009 Oct 23.	Neurorehabil Neural Repair. 2010	PubMed	citation	PMID:19855076	pubmed	19855076	create date:2009/10/27 | first author:Paoloni M
Sleeping implant in the temporal bone: report of a case with 20-year follow-up.	/pubmed/19843107	Granström G, Gröndahl HG, Tjellström A.	Clin Implant Dent Relat Res. 2012 Apr;14(2):236-40. doi: 10.1111/j.1708-8208.2009.00245.x. Epub 2009 Oct 16.	Clin Implant Dent Relat Res. 2012	PubMed	citation	PMID:19843107	pubmed	19843107	create date:2009/10/22 | first author:Granström G
Sensory and motor peripheral nerve function and lower-extremity quadriceps strength: the health, aging and body composition study.	/pubmed/19793163	Strotmeyer ES, de Rekeneire N, Schwartz AV, Resnick HE, Goodpaster BH, Faulkner KA, Shorr RI, Vinik AI, Harris TB, Newman AB; Health ABC Study..	J Am Geriatr Soc. 2009 Nov;57(11):2004-10. doi: 10.1111/j.1532-5415.2009.02487.x. Epub 2009 Sep 28.	J Am Geriatr Soc. 2009	PubMed	citation	PMID:19793163 | PMCID:PMC2899705	pubmed	19793163	create date:2009/10/02 | first author:Strotmeyer ES
Vibration therapy.	/pubmed/19740225	Rauch F.	Dev Med Child Neurol. 2009 Oct;51 Suppl 4:166-8. doi: 10.1111/j.1469-8749.2009.03418.x. Review.	Dev Med Child Neurol. 2009	PubMed	citation	PMID:19740225	pubmed	19740225	create date:2009/09/18 | first author:Rauch F
Effect of prolonged bed rest on the anterior hip muscles.	/pubmed/19726188	Dilani Mendis M, Hides JA, Wilson SJ, Grimaldi A, Belavý DL, Stanton W, Felsenberg D, Rittweger J, Richardson C.	Gait Posture. 2009 Nov;30(4):533-7. doi: 10.1016/j.gaitpost.2009.08.002. Epub 2009 Sep 1.	Gait Posture. 2009	PubMed	citation	PMID:19726188	pubmed	19726188	create date:2009/09/04 | first author:Dilani Mendis M
Whole-body vibration improves walking function in individuals with spinal cord injury: a pilot study.	/pubmed/19648013	Ness LL, Field-Fote EC.	Gait Posture. 2009 Nov;30(4):436-40. doi: 10.1016/j.gaitpost.2009.06.016. Epub 2009 Aug 3.	Gait Posture. 2009	PubMed	citation	PMID:19648013 | PMCID:PMC2753701	pubmed	19648013	create date:2009/08/04 | first author:Ness LL
Vibration therapy in multiple sclerosis: a pilot study exploring its effects on tone, muscle force, sensation and functional performance.	/pubmed/19561035	Schyns F, Paul L, Finlay K, Ferguson C, Noble E.	Clin Rehabil. 2009 Sep;23(9):771-81. doi: 10.1177/0269215508101758. Epub 2009 Jun 26.	Clin Rehabil. 2009	PubMed	citation	PMID:19561035	pubmed	19561035	create date:2009/06/30 | first author:Schyns F
Anti-spastic effects of the direct application of vibratory stimuli to the spastic muscles of hemiplegic limbs in post-stroke patients.	/pubmed/19557565	Noma T, Matsumoto S, Etoh S, Shimodozono M, Kawahira K.	Brain Inj. 2009 Jul;23(7):623-31. doi: 10.1080/02699050902997896.	Brain Inj. 2009	PubMed	citation	PMID:19557565	pubmed	19557565	create date:2009/06/27 | first author:Noma T
Effect of sensory re-education after low median nerve complete transection and repair.	/pubmed/19556076	Mavrogenis AF, Spyridonos SG, Antonopoulos D, Soucacos PN, Papagelopoulos PJ.	J Hand Surg Am. 2009 Sep;34(7):1210-5. doi: 10.1016/j.jhsa.2009.04.014. Epub 2009 Jun 25.	J Hand Surg Am. 2009	PubMed	citation	PMID:19556076	pubmed	19556076	create date:2009/06/27 | first author:Mavrogenis AF
Resistive vibration exercise attenuates bone and muscle atrophy in 56 days of bed rest: biochemical markers of bone metabolism.	/pubmed/19536451	Armbrecht G, Belavý DL, Gast U, Bongrazio M, Touby F, Beller G, Roth HJ, Perschel FH, Rittweger J, Felsenberg D.	Osteoporos Int. 2010 Apr;21(4):597-607. doi: 10.1007/s00198-009-0985-z. Epub 2009 Jun 18.	Osteoporos Int. 2010	PubMed	citation	PMID:19536451	pubmed	19536451	create date:2009/06/19 | first author:Armbrecht G
Influence of feedback parameters on performance of a vibrotactile balance prosthesis.	/pubmed/19497820	Goodworth AD, Wall C 3rd, Peterka RJ.	IEEE Trans Neural Syst Rehabil Eng. 2009 Aug;17(4):397-408. doi: 10.1109/TNSRE.2009.2023309. Epub 2009 Jun 2.	IEEE Trans Neural Syst Rehabil Eng. 2009	PubMed	citation	PMID:19497820 | PMCID:PMC2726898	pubmed	19497820	create date:2009/06/06 | first author:Goodworth AD
Whole-body vibration training increases muscle strength and mass in older women: a randomized-controlled trial.	/pubmed/19422657	Machado A, García-López D, González-Gallego J, Garatachea N.	Scand J Med Sci Sports. 2010 Apr;20(2):200-7. doi: 10.1111/j.1600-0838.2009.00919.x. Epub 2009 Apr 20.	Scand J Med Sci Sports. 2010	PubMed	citation	PMID:19422657	pubmed	19422657	create date:2009/05/09 | first author:Machado A
Sensorimotor dysfunction in multiple sclerosis and column-specific magnetization transfer-imaging abnormalities in the spinal cord.	/pubmed/19297508	Zackowski KM, Smith SA, Reich DS, Gordon-Lipkin E, Chodkowski BA, Sambandan DR, Shteyman M, Bastian AJ, van Zijl PC, Calabresi PA.	Brain. 2009 May;132(Pt 5):1200-9. doi: 10.1093/brain/awp032. Epub 2009 Mar 18.	Brain. 2009	PubMed	citation	PMID:19297508 | PMCID:PMC2677795	pubmed	19297508	create date:2009/03/20 | first author:Zackowski KM
Acute effects of whole-body vibration on lower extremity muscle performance in persons with multiple sclerosis.	/pubmed/19265758	Jackson KJ, Merriman HL, Vanderburgh PM, Brahler CJ.	J Neurol Phys Ther. 2008 Dec;32(4):171-6. doi: 10.1097/NPT.0b013e31818ee760.	J Neurol Phys Ther. 2008	PubMed	citation	PMID:19265758	pubmed	19265758	create date:2009/03/07 | first author:Jackson KJ
The effect of a vibratory lumber orthosis on walking velocity in patients with Parkinson's disease.	/pubmed/19235070	Ghoseiri K, Forogh B, Sanjari MA, Bavi A.	Prosthet Orthot Int. 2009 Mar;33(1):82-8. doi: 10.1080/03093640802647094.	Prosthet Orthot Int. 2009	PubMed	citation	PMID:19235070	pubmed	19235070	create date:2009/02/24 | first author:Ghoseiri K
Effect of whole body vibration in Parkinson's disease: a controlled study.	/pubmed/19199362	Arias P, Chouza M, Vivas J, Cudeiro J.	Mov Disord. 2009 Apr 30;24(6):891-8. doi: 10.1002/mds.22468.	Mov Disord. 2009	PubMed	citation	PMID:19199362	pubmed	19199362	create date:2009/02/10 | first author:Arias P
Effects of vibratory orthosis on balance in idiopathic Parkinson's disease.	/pubmed/19172481	Ghoseiri K, Forogh B, Sanjari MA, Bavi A.	Disabil Rehabil Assist Technol. 2009 Jan;4(1):58-63. doi: 10.1080/17483100802542868.	Disabil Rehabil Assist Technol. 2009	PubMed	citation	PMID:19172481	pubmed	19172481	create date:2009/01/28 | first author:Ghoseiri K
Non-pharmacological treatment and prevention of bone loss after spinal cord injury: a systematic review.	/pubmed/19172152	Biering-Sørensen F, Hansen B, Lee BS.	Spinal Cord. 2009 Jul;47(7):508-18. doi: 10.1038/sc.2008.177. Epub 2009 Jan 27. Review.	Spinal Cord. 2009	PubMed	citation	PMID:19172152	pubmed	19172152	create date:2009/01/28 | first author:Biering-Sørensen F
Effect of rear suspension and speed on seat forces and head accelerations experienced by manual wheelchair riders with spinal cord injury.	/pubmed/19165688	Requejo PS, Kerdanyan G, Minkel J, Adkins R, Waters R.	J Rehabil Res Dev. 2008;45(7):985-96.	J Rehabil Res Dev. 2008	PubMed	citation	PMID:19165688	pubmed	19165688	create date:2009/01/24 | first author:Requejo PS
Is visuospatial hemineglect really a determinant of postural control following stroke? An acute-phase study.	/pubmed/19118129	van Nes IJ, van der Linden S, Hendricks HT, van Kuijk AA, Rulkens M, Verhagen WI, Geurts AC.	Neurorehabil Neural Repair. 2009 Jul-Aug;23(6):609-14. doi: 10.1177/1545968308328731. Epub 2008 Dec 31.	Neurorehabil Neural Repair. 2009	PubMed	citation	PMID:19118129	pubmed	19118129	create date:2009/01/02 | first author:van Nes IJ
Disability and health status in patients with chronic inflammatory demyelinating polyneuropathy.	/pubmed/19034780	Westblad ME, Forsberg A, Press R.	Disabil Rehabil. 2009;31(9):720-5. doi: 10.1080/09638280802306497.	Disabil Rehabil. 2009	PubMed	citation	PMID:19034780	pubmed	19034780	create date:2008/11/27 | first author:Westblad ME
Countering postural posteffects following prolonged exposure to whole-body vibration: a sensorimotor treatment.	/pubmed/18974996	Oullier O, Kavounoudias A, Duclos C, Albert F, Roll JP, Roll R.	Eur J Appl Physiol. 2009 Jan;105(2):235-45. doi: 10.1007/s00421-008-0894-4. Epub 2008 Oct 31.	Eur J Appl Physiol. 2009	PubMed	citation	PMID:18974996	pubmed	18974996	create date:2008/11/01 | first author:Oullier O
Association of lower limb cutaneous sensitivity with gait speed in the elderly: the health ABC study.	/pubmed/18936557	Deshpande N, Ferrucci L, Metter J, Faulkner KA, Strotmeyer E, Satterfield S, Schwartz A, Simonsick E.	Am J Phys Med Rehabil. 2008 Nov;87(11):921-8. doi: 10.1097/PHM.0b013e31818a5556.	Am J Phys Med Rehabil. 2008	PubMed	citation	PMID:18936557 | PMCID:PMC3697864	pubmed	18936557	create date:2008/10/22 | first author:Deshpande N
Ankle flexors produce peak torque at longer muscle lengths after whole-body vibration.	/pubmed/18845976	Kemertzis MA, Lythgo ND, Morgan DL, Galea MP.	Med Sci Sports Exerc. 2008 Nov;40(11):1977-83. doi: 10.1249/MSS.0b013e31817eeeb8. Erratum in: Med Sci Sports Exerc. 2009 Feb;41(2):482.	Med Sci Sports Exerc. 2008	PubMed	citation	PMID:18845976	pubmed	18845976	create date:2008/10/11 | first author:Kemertzis MA
Alternate trains of postural muscle vibration promote cyclic body displacement in standing parkinsonian patients.	/pubmed/18785234	De Nunzio AM, Nardone A, Picco D, Nilsson J, Schieppati M.	Mov Disord. 2008 Nov 15;23(15):2186-93. doi: 10.1002/mds.22201.	Mov Disord. 2008	PubMed	citation	PMID:18785234	pubmed	18785234	create date:2008/09/12 | first author:De Nunzio AM
Assisted movement with enhanced sensation (AMES): coupling motor and sensory to remediate motor deficits in chronic stroke patients.	/pubmed/18645190	Cordo P, Lutsep H, Cordo L, Wright WG, Cacciatore T, Skoss R.	Neurorehabil Neural Repair. 2009 Jan;23(1):67-77. doi: 10.1177/1545968308317437. Epub 2008 Jul 21.	Neurorehabil Neural Repair. 2009	PubMed	citation	PMID:18645190	pubmed	18645190	create date:2008/07/23 | first author:Cordo P
Whole body vibration versus conventional physiotherapy to improve balance and gait in Parkinson's disease.	/pubmed/18295614	Ebersbach G, Edler D, Kaufhold O, Wissel J.	Arch Phys Med Rehabil. 2008 Mar;89(3):399-403. doi: 10.1016/j.apmr.2007.09.031.	Arch Phys Med Rehabil. 2008	PubMed	citation	PMID:18295614	pubmed	18295614	create date:2008/02/26 | first author:Ebersbach G
Effects of vibrating insoles on standing balance in diabetic neuropathy.	/pubmed/19319766	Hijmans JM, Geertzen JH, Zijlstra W, Hof AL, Postema K.	J Rehabil Res Dev. 2008;45(9):1441-9.	J Rehabil Res Dev. 2008	PubMed	citation	PMID:19319766	pubmed	19319766	create date:2008/01/01 | first author:Hijmans JM
Comparison of wheelchair wheels in terms of vibration and spasticity in people with spinal cord injury.	/pubmed/19319752	Vorrink SN, Van der Woude LH, Messenberg A, Cripton PA, Hughes B, Sawatzky BJ.	J Rehabil Res Dev. 2008;45(9):1269-79.	J Rehabil Res Dev. 2008	PubMed	citation	PMID:19319752	pubmed	19319752	create date:2008/01/01 | first author:Vorrink SN
Development of vibrating insoles.	/pubmed/17975456	Hijmans JM, Geertzen JH, Schokker B, Postema K.	Int J Rehabil Res. 2007 Dec;30(4):343-5.	Int J Rehabil Res. 2007	PubMed	citation	PMID:17975456	pubmed	17975456	create date:2007/11/03 | first author:Hijmans JM
Development of the navigation system for the visually impaired by using white cane.	/pubmed/17945865	Hirahara Y, Sakurai Y, Shiidu Y, Yanashima K, Magatani K.	Conf Proc IEEE Eng Med Biol Soc. 2006;1:4893-6.	Conf Proc IEEE Eng Med Biol Soc. 2006	PubMed	citation	PMID:17945865	pubmed	17945865	create date:2007/10/20 | first author:Hirahara Y
One session of whole body vibration increases voluntary muscle strength transiently in patients with stroke.	/pubmed/17875558	Tihanyi TK, Horváth M, Fazekas G, Hortobágyi T, Tihanyi J.	Clin Rehabil. 2007 Sep;21(9):782-93.	Clin Rehabil. 2007	PubMed	citation	PMID:17875558	pubmed	17875558	create date:2007/09/19 | first author:Tihanyi TK
Stance time and step width variability have unique contributing impairments in older persons.	/pubmed/17632004	Brach JS, Studenski S, Perera S, VanSwearingen JM, Newman AB.	Gait Posture. 2008 Apr;27(3):431-9. Epub 2007 Jul 13.	Gait Posture. 2008	PubMed	citation	PMID:17632004 | PMCID:PMC2276116	pubmed	17632004	create date:2007/07/17 | first author:Brach JS
Relationship between self-reported upper limb disability and quantitative tests in hand-arm vibration syndrome.	/pubmed/17364787	Poole K, Mason H.	Disabil Rehabil. 2007 Mar 15;29(5):359-66.	Disabil Rehabil. 2007	PubMed	citation	PMID:17364787	pubmed	17364787	create date:2007/03/17 | first author:Poole K
Whole-body vibration training compared with resistance training: effect on spasticity, muscle strength and motor performance in adults with cerebral palsy.	/pubmed/16931460	Ahlborg L, Andersson C, Julin P.	J Rehabil Med. 2006 Sep;38(5):302-8.	J Rehabil Med. 2006	PubMed	citation	PMID:16931460	pubmed	16931460	create date:2006/08/26 | first author:Ahlborg L
Long-term effects of 6-week whole-body vibration on balance recovery and activities of daily living in the postacute phase of stroke: a randomized, controlled trial.	/pubmed/16902175	van Nes IJ, Latour H, Schils F, Meijer R, van Kuijk A, Geurts AC.	Stroke. 2006 Sep;37(9):2331-5. Epub 2006 Aug 10.	Stroke. 2006	PubMed	citation	PMID:16902175	pubmed	16902175	create date:2006/08/12 | first author:van Nes IJ
Submaximal aerobic exercise with mechanical vibrations improves the functional status of patients with chronic fatigue syndrome.	/pubmed/16767057	Saggini R, Vecchiet J, Iezzi S, Racciatti D, Affaitati G, Bellomo RG, Pizzigallo E.	Eura Medicophys. 2006 Jun;42(2):97-102.	Eura Medicophys. 2006	PubMed	citation	PMID:16767057	pubmed	16767057	create date:2006/06/13 | first author:Saggini R
Human skeletal muscle structure and function preserved by vibration muscle exercise following 55 days of bed rest.	/pubmed/16568340	Blottner D, Salanova M, Püttmann B, Schiffl G, Felsenberg D, Buehring B, Rittweger J.	Eur J Appl Physiol. 2006 Jun;97(3):261-71. Epub 2006 Mar 28.	Eur J Appl Physiol. 2006	PubMed	citation	PMID:16568340	pubmed	16568340	create date:2006/03/29 | first author:Blottner D
Sensorimotor function and axonal integrity in adrenomyeloneuropathy.	/pubmed/16401738	Zackowski KM, Dubey P, Raymond GV, Mori S, Bastian AJ, Moser HW.	Arch Neurol. 2006 Jan;63(1):74-80.	Arch Neurol. 2006	PubMed	citation	PMID:16401738	pubmed	16401738	create date:2006/01/13 | first author:Zackowski KM
Effects of random whole-body vibration on postural control in Parkinson's disease.	/pubmed/16392539	Turbanski S, Haas CT, Schmidtbleicher D, Friedrich A, Duisberg P.	Res Sports Med. 2005 Jul-Sep;13(3):243-56.	Res Sports Med. 2005	PubMed	citation	PMID:16392539	pubmed	16392539	create date:2006/01/06 | first author:Turbanski S
Effects of whole-body vibration in patients with multiple sclerosis: a pilot study.	/pubmed/16323382	Schuhfried O, Mittermaier C, Jovanovic T, Pieber K, Paternostro-Sluga T.	Clin Rehabil. 2005 Dec;19(8):834-42.	Clin Rehabil. 2005	PubMed	citation	PMID:16323382	pubmed	16323382	create date:2005/12/06 | first author:Schuhfried O
Spatial attention affects sensorimotor reorganisation in human motor cortex.	/pubmed/16292637	Rosenkranz K, Rothwell JC.	Exp Brain Res. 2006 Mar;170(1):97-108. Epub 2005 Nov 16.	Exp Brain Res. 2006	PubMed	citation	PMID:16292637	pubmed	16292637	create date:2005/11/18 | first author:Rosenkranz K
Effect of penile vibratory stimulation on spasticity in men with spinal cord injury.	/pubmed/16244525	Alaca R, Goktepe AS, Yildiz N, Yilmaz B, Gunduz S.	Am J Phys Med Rehabil. 2005 Nov;84(11):875-9.	Am J Phys Med Rehabil. 2005	PubMed	citation	PMID:16244525	pubmed	16244525	create date:2005/10/26 | first author:Alaca R
Abdominal electric stimulation facilitates penile vibratory stimulation for ejaculation after spinal cord injury: a single-subject trial.	/pubmed/16181958	Goetz LL, Stiens SA.	Arch Phys Med Rehabil. 2005 Sep;86(9):1879-83.	Arch Phys Med Rehabil. 2005	PubMed	citation	PMID:16181958	pubmed	16181958	create date:2005/09/27 | first author:Goetz LL
Somatosensation, circulation and stance balance in elderly dysvascular transtibial amputees.	/pubmed/16180604	Quai TM, Brauer SG, Nitz JC.	Clin Rehabil. 2005 Sep;19(6):668-76.	Clin Rehabil. 2005	PubMed	citation	PMID:16180604	pubmed	16180604	create date:2005/09/27 | first author:Quai TM
Auditory localization abilities in bilateral cochlear implant recipients.	/pubmed/16151344	Verschuur CA, Lutman ME, Ramsden R, Greenham P, O'Driscoll M.	Otol Neurotol. 2005 Sep;26(5):965-71.	Otol Neurotol. 2005	PubMed	citation	PMID:16151344	pubmed	16151344	create date:2005/09/10 | first author:Verschuur CA
The effect of penile vibratory stimulation on male fertility potential, spasticity and neurogenic detrusor overactivity in spinal cord lesioned individuals.	/pubmed/15986748	Biering-Sørensen F, Laeessøe L, Sønksen J, Bagi P, Nielsen JB, Kristensen JK.	Acta Neurochir Suppl. 2005;93:159-63. Review.	Acta Neurochir Suppl. 2005	PubMed	citation	PMID:15986748	pubmed	15986748	create date:2005/07/01 | first author:Biering-Sørensen F
Reflex contribution of spindle group Ia and II afferent input to leg muscle spasticity as revealed by tendon vibration in hemiparesis.	/pubmed/15978499	Nardone A, Schieppati M.	Clin Neurophysiol. 2005 Jun;116(6):1370-81. Epub 2005 Apr 1.	Clin Neurophysiol. 2005	PubMed	citation	PMID:15978499	pubmed	15978499	create date:2005/06/28 | first author:Nardone A
New functional vibratory stimulation device for extremities in patients with stroke.	/pubmed/15573001	Kawahira K, Higashihara K, Matsumoto S, Shimodozono M, Etoh S, Tanaka N, Sueyoshi Y.	Int J Rehabil Res. 2004 Dec;27(4):335-7.	Int J Rehabil Res. 2004	PubMed	citation	PMID:15573001	pubmed	15573001	create date:2004/12/02 | first author:Kawahira K
Short-term effects of whole-body vibration on postural control in unilateral chronic stroke patients: preliminary evidence.	/pubmed/15502741	van Nes IJ, Geurts AC, Hendricks HT, Duysens J.	Am J Phys Med Rehabil. 2004 Nov;83(11):867-73.	Am J Phys Med Rehabil. 2004	PubMed	citation	PMID:15502741	pubmed	15502741	create date:2004/10/27 | first author:van Nes IJ
An investigation into the effect of limiting the frequency bandwidth of speech on speech recognition in adult cochlear implant users.	/pubmed/15457818	Milchard AJ, Cullington HE.	Int J Audiol. 2004 Jun;43(6):356-62.	Int J Audiol. 2004	PubMed	citation	PMID:15457818	pubmed	15457818	create date:2004/10/02 | first author:Milchard AJ
Evaluation of postural stability in the elderly with stroke.	/pubmed/15241756	Corriveau H, Hébert R, Raîche M, Prince F.	Arch Phys Med Rehabil. 2004 Jul;85(7):1095-101.	Arch Phys Med Rehabil. 2004	PubMed	citation	PMID:15241756	pubmed	15241756	create date:2004/07/09 | first author:Corriveau H
Effect of mastoid oscillation on the outcome of the canalith repositioning procedure.	/pubmed/15235364	Motamed M, Osinubi O, Cook JA.	Laryngoscope. 2004 Jul;114(7):1296-8.	Laryngoscope. 2004	PubMed	citation	PMID:15235364	pubmed	15235364	create date:2004/07/06 | first author:Motamed M
Group II spindle fibres and afferent control of stance. Clues from diabetic neuropathy.	/pubmed/15003757	Nardone A, Schieppati M.	Clin Neurophysiol. 2004 Apr;115(4):779-89.	Clin Neurophysiol. 2004	PubMed	citation	PMID:15003757	pubmed	15003757	create date:2004/03/09 | first author:Nardone A
Vibrotactile display coding for a balance prosthesis.	/pubmed/14960115	Kadkade PP, Benda BJ, Schmidt PB, Wall C 3rd.	IEEE Trans Neural Syst Rehabil Eng. 2003 Dec;11(4):392-9.	IEEE Trans Neural Syst Rehabil Eng. 2003	PubMed	citation	PMID:14960115	pubmed	14960115	create date:2004/02/13 | first author:Kadkade PP
Lasting amelioration of spatial neglect by treatment with neck muscle vibration even without concurrent training.	/pubmed/14664313	Johannsen L, Ackermann H, Karnath HO.	J Rehabil Med. 2003 Nov;35(6):249-53.	J Rehabil Med. 2003	PubMed	citation	PMID:14664313	pubmed	14664313	create date:2003/12/11 | first author:Johannsen L
Whole-body vibration during manual wheelchair propulsion with selected seat cushions and back supports.	/pubmed/14518796	DiGiovine CP, Cooper RA, Fitzgerald SG, Boninger ML, Wolf EJ, Guo S.	IEEE Trans Neural Syst Rehabil Eng. 2003 Sep;11(3):311-22.	IEEE Trans Neural Syst Rehabil Eng. 2003	PubMed	citation	PMID:14518796	pubmed	14518796	create date:2003/10/02 | first author:DiGiovine CP
Balance prostheses for postural control.	/pubmed/12733464	Wall C 3rd, Weinberg MS.	IEEE Eng Med Biol Mag. 2003 Mar-Apr;22(2):84-90. Review. No abstract available.	IEEE Eng Med Biol Mag. 2003	PubMed	citation	PMID:12733464	pubmed	12733464	create date:2003/05/08 | first author:Wall C 3rd
